# Supplementary material for: Filling the Gaps in the Kirromycin Biosynthesis: Deciphering the Role of Genes Involved in Ethylmalonyl-CoA Supply and Tailoring Reactions
Source: PubMed Central journal article supplement (PMC5818483; doi:10.1038/s41598-018-21507-6), 2018-02-19
Supplement: 41598_2018_21507_MOESM1_ESM.pdf [file 41598_2018_21507_MOESM1_ESM.pdf]

## Supplementary Information

# Filling the Gaps in the Kirromycin Biosynthesis: Deciphering the Role of Genes Involved in Ethylmalonyl-CoA Supply and Tailoring Reactions

Helene L. Robertsen<sup>a,1</sup>, Ewa M. Musiol-Kroll<sup>a,1,2,3</sup>, Ling Ding<sup>1</sup>, Kristina J. Laiple<sup>2</sup>,  
Torben Hofeditz<sup>4</sup>, Wolfgang Wohlleben<sup>2,3</sup>, Sang Yup Lee<sup>1,5</sup>, Stephanie Grond<sup>4</sup>, and  
Tilmann Weber<sup>1</sup>

<sup>a</sup>Equal contribution

<sup>1</sup>Novo Nordisk Foundation Center for Biosustainability, Technical University of  
Denmark, Kemitorvet 220, 2800 Kgs. Lyngby, Denmark

<sup>2</sup>Eberhard-Karls-Universität Tübingen, Interfakultäres Institut für Mikrobiologie und  
Infektionsmedizin, Microbiology/Biotechnology, Auf der Morgenstelle 28, 72076  
Tübingen, Germany

<sup>3</sup>German Centre for Infection Research (DZIF), Partner site Tübingen, Auf der  
Morgenstelle 28, 72076 Tübingen, Germany

<sup>4</sup>Eberhard-Karls-Universität Tübingen, Institut für Organische Chemie, Auf der  
Morgenstelle 18, 72076 Tübingen, Germany

<sup>5</sup>Department of Chemical and Biomolecular Engineering (BK21 Plus Program),  
Korea Advanced Institute of Science and Technology (KAIST), 291 Daehak-ro,  
Yuseong-gu, Daejeon 305-701, Republic of Korea

## Table of Contents

|                                                                                                                                                                                                                                     |    |
|-------------------------------------------------------------------------------------------------------------------------------------------------------------------------------------------------------------------------------------|----|
| Table S1: Strains and plasmids in this study.....                                                                                                                                                                                   | 3  |
| Table S2: Primers used in this study.....                                                                                                                                                                                           | 6  |
| Table S3: HPLC-ESI-HRMS data for kirromycin and derivatives.....                                                                                                                                                                    | 9  |
| Table S4: <sup>1</sup> H NMR spectra and assignments.....                                                                                                                                                                           | 10 |
| Figure S1-I – S1-II: UV-VIS profiles of $\Delta kirHIV$ and $\Delta kirHV$ mutants .....                                                                                                                                            | 14 |
| Figure S2-I – S2-V: MS/MS spectra of kirromycin and derivatives.....                                                                                                                                                                | 15 |
| Figure S3-I – S3-VI: HPLC-ESI-UV-Vis profiles of the wild type (WT), $\Delta kir$ mutants, and complemented mutants .....                                                                                                           | 18 |
| Figure S4-IA/B – S4-IIA/B: <sup>1</sup> H NMR and <sup>13</sup> C NMR data and assignment for 30-deoxy-kirromycin (3), 5,6-dihydro-kirromycin (4), and 30-hydroxy-5,6-dehydro-1- <i>N</i> -demethyl-16-deoxy-kirrothricin (5) ..... | 21 |
| Figure S5-I – S5-III: 2D-NMR of 30-deoxy-kirromycin (3), 5,6-dihydro-kirromycin (4), and 30-hydroxy-5,6-dehydro-1- <i>N</i> -demethyl-16-deoxy-kirrothricin (5) .....                                                               | 25 |
| Figure S6-I – S6-II: Verification of $\Delta kir$ mutants by control PCRs.....                                                                                                                                                      | 35 |
| Figure S7-I – S7-III: Putative enzymatic reactions catalysed by tailoring enzymes KirHVI, KirOI, and KirOII.....                                                                                                                    | 36 |
| Supplementary references.....                                                                                                                                                                                                       | 38 |

**Table S1: Strains and plasmids in this study**

| Source                             | Description/Genotype                                                                                                                                                                                                                                                                                                               | Reference                     |
|------------------------------------|------------------------------------------------------------------------------------------------------------------------------------------------------------------------------------------------------------------------------------------------------------------------------------------------------------------------------------|-------------------------------|
| <b><i>E. coli</i> strains</b>      |                                                                                                                                                                                                                                                                                                                                    |                               |
| <i>E. coli</i> DH5- $\alpha$       | <i>fhuA2</i> , $\Delta(\text{argF-lacZ})\text{U169}$ , <i>phoA</i> , <i>glnV44</i> , $\Phi 80$ , $\Delta(\text{lacZ})\text{M15}$ , <i>gyrA96</i> , <i>recA1</i> , <i>relA1</i> , <i>endA1</i> , <i>thi-1</i> , <i>hsdR17</i>                                                                                                       | New England Biolabs           |
| <i>E. coli</i> ET12567 (pUZ8002)   | <i>dam13::Tn9(ChlR)</i> , <i>dcm-6</i> , <i>hsdM</i> , <i>hsdR</i> , <i>recF143</i> , <i>zjj-201::Tn10</i> , <i>galK2</i> , <i>galT22</i> , <i>ara14</i> , <i>lacY1</i> , <i>xyl-5</i> , <i>leuB6</i> , <i>thi-1</i> , <i>tonA31</i> , <i>rpsL136</i> , <i>hisG4</i> , <i>tsx-78</i> , <i>mtII</i> , <i>glnV44</i> . pUZ8002(KanR) | 1                             |
| <b><i>Streptomyces</i> strains</b> |                                                                                                                                                                                                                                                                                                                                    |                               |
| <i>S. collinus</i> Tü 365          | Wild type <i>Streptomyces collinus</i> Tü 365                                                                                                                                                                                                                                                                                      | 2                             |
| $\Delta\text{kirM}$                | <i>S. collinus</i> Tü 365 deletion mutant in <i>kirM</i>                                                                                                                                                                                                                                                                           | This study                    |
| $\Delta\text{kirHVI}$              | <i>S. collinus</i> Tü 365 deletion mutant in <i>kirHVI</i>                                                                                                                                                                                                                                                                         | This study                    |
| $\Delta\text{kirOI}$               | <i>S. collinus</i> gene replacement mutant in which <i>kirOI</i> is replaced by the thiostrepton resistance cassette with the <i>ermE*</i> promoter downstream. ThioR                                                                                                                                                              | This study                    |
| $\Delta\text{kirOII}$              | <i>S. collinus</i> gene replacement mutant in which <i>kirOII</i> is replaced by the thiostrepton resistance cassette with the <i>ermE*</i> promoter downstream. ThioR                                                                                                                                                             | This study                    |
| $\Delta\text{kirHIV}$              | <i>S. collinus</i> Tü 365 deletion mutant in <i>kirHIV</i>                                                                                                                                                                                                                                                                         | This study                    |
| $\Delta\text{kirHV}$               | <i>S. collinus</i> Tü 365 deletion mutant in <i>kirHV</i>                                                                                                                                                                                                                                                                          | This study                    |
| $\Delta\text{kirN}$                | <i>S. collinus</i> Tü 365 deletion mutant in <i>kirN</i>                                                                                                                                                                                                                                                                           | This study                    |
| $\Delta\text{kirOI-pGM1190}$       | $\Delta\text{kirOI}$ complemented with replicative plasmid pGM1190- <i>kirOI</i> . ApraR, ThioR                                                                                                                                                                                                                                    | This study                    |
| $\Delta\text{kirM-pRM4}$           | $\Delta\text{kirM}$ complemented with integrative plasmid pRM4- <i>kirM</i> . ApraR                                                                                                                                                                                                                                                | This study                    |
| $\Delta\text{kirHVI-pRM4}$         | $\Delta\text{kirHVI}$ complemented with integrative plasmid pRM4- <i>kirHVI</i> . ApraR                                                                                                                                                                                                                                            | This study                    |
| $\Delta\text{kirOII-pRM4}$         | $\Delta\text{kirOII}$ complemented with integrative plasmid pRM4- <i>kirOII</i> . ApraR, ThioR                                                                                                                                                                                                                                     | This study                    |
| $\Delta\text{kirN-pRM4}_1$         | $\Delta\text{kirN}$ complemented with integrative plasmid pRM4- <i>kirHVI</i> . ApraR                                                                                                                                                                                                                                              | This study                    |
| $\Delta\text{kirN-pRM4}_2$         | $\Delta\text{kirN}$ complemented with integrative plasmid pRM4- <i>kirN+HVI</i> . ApraR                                                                                                                                                                                                                                            | This study                    |
| <b>Cosmids</b>                     |                                                                                                                                                                                                                                                                                                                                    |                               |
| 1C24                               | pOJ436 cosmid vector with a fragment of the genome of kirromycin producer <i>Streptomyces collinus</i> Tü 365                                                                                                                                                                                                                      | 3                             |
| 2K05                               | pOJ436 cosmid vector with a fragment of the genome of kirromycin producer <i>Streptomyces collinus</i> Tü 365                                                                                                                                                                                                                      | 3                             |
| <b>Plasmids</b>                    |                                                                                                                                                                                                                                                                                                                                    |                               |
| pJet1.2/blunt                      | <i>rep</i> (pMB1), <i>bla</i> (AmpR), <i>eco47IR</i> , PlacUV5, T7 RNA polymerase promoter. Part of the CloneJET™ PCR Cloning Kit used for high efficiency cloning of PCR products                                                                                                                                                 | Thermo Fisher Scientific Inc. |
| pDrive                             | T7 RNA polymerase promoter, LacZ $\alpha$ , SP6 RNA polymerase promoter, AmpR, KanR, pUC origin, phage f1 origin of replication. For construction of $\Delta\text{kirOI}$ and $\Delta\text{kirOII}$ gene inactivation plasmids                                                                                                     | Qiagen                        |
| pGUSA21                            | Promoter probe vector, pSETGUS with deleted KpnI fragment containing TipA promoter. <i>gusA</i> , $\Delta\text{int}$ , $\Delta\text{attB}$ , MCS from pUC21. Used for gene inactivation                                                                                                                                            | 4                             |

| Source                             | Description/Genotype                                                                                                                                                                                                                                              | Reference                        |
|------------------------------------|-------------------------------------------------------------------------------------------------------------------------------------------------------------------------------------------------------------------------------------------------------------------|----------------------------------|
| pGM1190                            | pGM190 derivative in which the kanamycin resistance cassette is exchanged with the apramycin resistance gene <i>aac3(3)IV</i> . TipA promoter. ApraR, ThioR. Used for complementation of the $\Delta kirOI$ mutant                                                | G. Muth (personal communication) |
| pRM4                               | pSET152 <i>ermEp</i> derivative with an artificial RBS, $\Phi C31$ integration vector, <i>ermE*</i> promoter. ApraR. Used for complementation of the <i>kir</i> mutants                                                                                           | 5                                |
| pA18mob                            | pK18mob derivative in which <i>aphII</i> is replaced with the apramycin resistance cassette. <i>oriT</i> , <i>lacZa</i> . ApraR. Used for construction of gene replacement mutants of <i>kirOI</i> and <i>kirOII</i> .                                            | 3                                |
| pSLE61                             | pUC19 derivative. <i>lacZa</i> , <i>oriI</i> , pSG5 replicon. AmpR, ThioR. For amplification of thiostrepton resistance cassette                                                                                                                                  | 6                                |
| pCRISPR-Cas9                       | Derivative of pGM1190 with Cas9 under the control of TipA promoter                                                                                                                                                                                                | 7                                |
| pCRISPR-Cas9_USER- $\Delta kirM$   | USER-compatible destination vector, which is a derivative of pGM1190 with Cas9 under the control of TipA promoter. Cloned with <i>ermE*</i> promoter between sgRNA and 1 kb flanking regions right and left of <i>kirM</i> inserted in the USER cassette. ApraR   | 7,8                              |
| pCRISPR-Cas9_USER- $\Delta kirHIV$ | USER-compatible destination vector, which is a derivative of pGM1190 with Cas9 under the control of TipA promoter. Cloned with <i>ermE*</i> promoter between sgRNA and 1 kb flanking regions right and left of <i>kirHIV</i> inserted in the USER cassette. ApraR | 7,8                              |
| pCRISPR-Cas9_USER- $\Delta kirHV$  | USER-compatible destination vector, which is a derivative of pGM1190 with Cas9 under the control of TipA promoter. Cloned with <i>ermE*</i> promoter between sgRNA and 1 kb flanking regions right and left of <i>kirHV</i> inserted in the USER cassette. ApraR  | 7,8                              |
| pCRISPR-Cas9_USER- $\Delta kirN$   | USER-compatible destination vector, which is a derivative of pGM1190 with Cas9 under the control of TipA promoter. Cloned with <i>ermE*</i> promoter between sgRNA and 1 kb flanking regions right and left of <i>kirN</i> inserted in the USER cassette. ApraR   | 7,8                              |
| pHR1                               | pGUSA21 deletion plasmid of <i>kirM</i> cloned with <i>ermE*</i> promoter between 1 kb flanking regions of the gene. 2.1 kb construct cloned from pCRISPR-Cas9_USER- <i>kirM</i> . ApraR                                                                          | This study                       |
| pHR2                               | pGUSA21 deletion plasmid of <i>kirHVI</i> cloned with <i>ermE*</i> promoter between 1 kb flanking regions of the gene. ApraR                                                                                                                                      | This study                       |
| pHR3                               | pGUSA21 deletion plasmid of <i>kirHIV</i> cloned with <i>ermE*</i> promoter between 1 kb flanking regions of the gene. 2.1 kb construct cloned from pCRISPR-Cas9_USER- <i>kirHIV</i> . ApraR                                                                      | This study                       |
| pHR4                               | pGUSA21 deletion plasmid of <i>kirHV</i> cloned with <i>ermE*</i> promoter between 1 kb flanking regions of the gene. 2.1 kb construct cloned from pCRISPR-Cas9_USER- <i>kirHV</i> . ApraR                                                                        | This study                       |
| pHR5                               | pGUSA21 deletion plasmid of <i>kirN</i> cloned with <i>ermE*</i> promoter between 1 kb flanking regions of the gene. 2.1 kb construct cloned from pCRISPR-Cas9_USER- <i>kirN</i> . ApraR                                                                          | This study                       |
| pTL- <i>kirOI</i>                  | 1.2 kb flanking regions left and right of <i>kirOI</i> cloned in pA18mob. ApraR                                                                                                                                                                                   | This study                       |
| pTL- <i>kirOI</i> -thio            | pTL- <i>kirOI</i> cloned with thiostrepton resistance cassette                                                                                                                                                                                                    | This study                       |

| Source                   | Description/Genotype                                                                                        | Reference  |
|--------------------------|-------------------------------------------------------------------------------------------------------------|------------|
|                          | inserted in XbaI site. ApraR, ThioR                                                                         |            |
| pDW- <i>kirOII</i>       | 2 kb flanking regions left and right of <i>kirOII</i> cloned in pA18mob. ApraR                              | This study |
| pDW- <i>kirOII</i> -thio | pDW- <i>kirOII</i> cloned with thioStreptomycin resistance cassette inserted in the XbaI site. ApraR, ThioR | This study |
| pJet1.2- <i>kirM</i>     | pJet1.2/blunt with <i>kirM</i> cloned in the MCS. AmpR                                                      | This study |
| pJet1.2- <i>kirHVI</i>   | pJet1.2/blunt with <i>kirHVI</i> cloned in the MCS. AmpR                                                    | This study |
| pJet1.2- <i>kirOI</i>    | pJet1.2/blunt with <i>kirOI</i> cloned in the MCS. AmpR                                                     | This study |
| pJet1.2- <i>kirOII</i>   | pJet1.2/blunt with <i>kirOII</i> cloned in the MCS. AmpR                                                    | This study |
| pJet1.2- <i>kirN</i>     | pJet1.2/blunt with <i>kirN</i> cloned in the MCS. AmpR                                                      | This study |
| pJet1.2- <i>kirN+HVI</i> | pJet1.2/blunt with <i>kirN+HVI</i> cloned in the MCS. AmpR                                                  | This study |
| pGM1190- <i>kirOI</i>    | pGM1190 with <i>kirOI</i> cloned in HindIII + EcoRI site                                                    | This study |
| pRM4- <i>kirM</i>        | pRM4 with <i>kirM</i> cloned in NdeI + HindIII site                                                         | This study |
| pRM4- <i>kirHVI</i>      | pRM4 with <i>kirHVI</i> cloned in NdeI + HindIII site                                                       | This study |
| pRM4- <i>kirOII</i>      | pRM4 with <i>kirOII</i> cloned in NheI + HindIII site                                                       | This study |
| pRM4- <i>kirN</i>        | pRM4 with of <i>kirN</i> cloned in NdeI + HindIII site                                                      | This study |
| pRM4- <i>kirN+HVI</i>    | pRM4 with <i>kirN+kirHVI</i> cloned in NdeI + HindIII site                                                  | This study |

**Table S2: Primers used in this study**

| ID                                                               | Primer name          | Sequence (5' - 3')                                                    | PCR program                                                                                                               |
|------------------------------------------------------------------|----------------------|-----------------------------------------------------------------------|---------------------------------------------------------------------------------------------------------------------------|
| <b><i>kirM, kirN, kirHIV, and kirHV</i> inactivation mutants</b> |                      |                                                                       |                                                                                                                           |
| KP1                                                              | kirM_pGUS_left_FW    | CTGCAGACGCGTCGACGTCGAAGC<br>GACGAGGAGCTGGCG                           | 1. 98°C, 0:30 min<br>2. 98°C, 0:10 min<br>3. 73°C, 0:30 min<br>4. 72°C, 1:00 min<br>5. 72°C, 5:00 min<br>(Steps 2-4 × 34) |
| KP2                                                              | kirM_pGUS_left_RV    | ATTACCTGTTATCCCTAGTTAGT<br>ACGCGGGCCCCAGG                             |                                                                                                                           |
| KP3                                                              | kirN_pGUS_left_FW    | GGAGCTCGAATTCGAAGCTTCTG<br>CAGACGCGTCGACGTCATATGCG<br>ACCCCGACCAGGA   | 1. 98°C, 0:30 min<br>2. 98°C, 0:10 min<br>3. 75°C, 0:30 min<br>4. 72°C, 1:00 min<br>5. 72°C, 5:00 min<br>(Steps 2-4 × 34) |
| KP4                                                              | kirN_pGUS_right_RV   | GCGGGAAGCAGTGATAAGCATT<br>ACCCTGTTATCCCTAGTTCTAGA<br>ATCTCCGACGACGCGT |                                                                                                                           |
| KP5                                                              | kirHIV_pGUS_left_FW  | GCAGACGCGTCGACGTCACTGCT<br>CAAGTACTTCGACTCGAC                         | 1. 98°C, 0:30 min<br>2. 98°C, 0:10 min<br>3. 70°C, 0:30 min<br>4. 72°C, 1:00 min<br>5. 72°C, 5:00 min<br>(Steps 2-4 × 34) |
| KP6                                                              | kirHIV_pGUS_right_RV | ATTACCTGTTATCCCTAGTTTGA<br>CCAGCGCCAGTTGTG                            |                                                                                                                           |
| KP7                                                              | kirHV_pGUS_left_FW   | CTGCAGACGCGTCGACGTCAGCT<br>CAGCTTCGCCGC                               | 1. 98°C, 0:30 min<br>2. 98°C, 0:10 min<br>3. 73°C, 0:30 min<br>4. 72°C, 1:00 min<br>5. 72°C, 5:00 min<br>(Steps 2-4 × 34) |
| KP8                                                              | kirHV_pGUS_right_RV  | ATTACCTGTTATCCCTAGTTGA<br>CGATGTCGGGATCCTCCC                          |                                                                                                                           |
| <b><i>kirHVI</i> inactivation mutant</b>                         |                      |                                                                       |                                                                                                                           |
| KP9                                                              | kirHVI_pGUS_left_FW  | GACGCGTCGACGTCACCGGAGTC<br>GTGCTG                                     | 1. 98°C, 0:30 min<br>2. 98°C, 0:10 min<br>3. 72°C, 0:30 min<br>4. 72°C, 0:30 min<br>5. 72°C, 5:00 min<br>(Steps 2-4 × 34) |
| KP10                                                             | kirHVI_pGUS_left_RV  | GTCAAGATCGACCGCTTGTTCC<br>CTTCCCTG                                    |                                                                                                                           |
| KP11                                                             | kirHVI_pGUS_ermE_FW  | CTACAGGGAAGGGAAACAAGCG<br>GTCGATCTTGACG                               | 1. 98°C, 0:30 min<br>2. 98°C, 0:10 min<br>3. 74°C, 0:10 min<br>4. 72°C, 1:00 min<br>5. 72°C, 5:00 min<br>(Steps 2-4 × 34) |
| KP12                                                             | kirHVI_pGUS_ermE_RV  | CGACGGGCGGCTCGCCGTCGATC<br>CTACCAA                                    |                                                                                                                           |
| KP13                                                             | kirHVI_pGUS_right_FW | GGTAGGATCGACGGCGAGCCGC<br>CCGTCG                                      | 1. 98°C, 0:30 min<br>2. 98°C, 0:10 min<br>3. 75°C, 0:30 min<br>4. 72°C, 0:30 min<br>5. 72°C, 5:00 min<br>(Steps 2-4 × 34) |
| KP14                                                             | kirHVI_pGUS_right_RV | ATTACCTGTTATCCCTAGTTGG<br>ACGCGACCAGGCCGC                             |                                                                                                                           |

| ID                                                         | Primer name              | Sequence (5' - 3')                     | PCR program                                                                                                               |
|------------------------------------------------------------|--------------------------|----------------------------------------|---------------------------------------------------------------------------------------------------------------------------|
| <b><i>kirOI</i> and <i>kirOII</i> inactivation mutants</b> |                          |                                        |                                                                                                                           |
| KP15                                                       | 1ldOxy5                  | AACTGCAGTCAACATCACCTACG<br>ACC         | 1. 94°C, 2:00 min<br>2. 94°C, 1:15 min<br>3. 60°C, 1:30 min<br>4. 72°C, 1:30 min<br>5. 72°C, 5:00 min<br>(Steps 2-4 × 30) |
| KP16                                                       | 1ldOxy3                  | AATCTAGACTCGTCGTAGCCGGT<br>G           |                                                                                                                           |
| KP17                                                       | 1rdOxy5                  | AATCTAGAGTCGGCCAGCAACTG<br>G           |                                                                                                                           |
| KP18                                                       | 1rdOxy3                  | AAGAATTTCGAACACGTCGATGTG<br>CG         |                                                                                                                           |
| KP19                                                       | thio-up                  | ACTCTAGATCACTGACGAATCGA<br>GGTCGAGGA   |                                                                                                                           |
| KP20                                                       | thio-low                 | AATCTAGAGGCGAATACTTCATA<br>TGCGGGGAT   |                                                                                                                           |
| KP21                                                       | leftOIIeco5              | GAATTCGTGCCAGGAGGTGATCC                | 1. 94°C, 2:00 min<br>2. 94°C, 1:15 min<br>3. 60°C, 1:30 min<br>4. 72°C, 2:00 min<br>5. 72°C, 5:00 min<br>(Steps 2-4 × 30) |
| KP22                                                       | leftOIIxba3              | TCTAGACTCGACGTCCGTCCAAT<br>C           |                                                                                                                           |
| KP23                                                       | rightOIIxba5             | TCTAGAGGCCCGCGCTTCTGAA<br>AG           |                                                                                                                           |
| KP24                                                       | rightOIIhind3            | AAGCTTCAGCGCGAACTGCGTCG                |                                                                                                                           |
| <b>Complementation plasmids</b>                            |                          |                                        |                                                                                                                           |
| KP27                                                       | kirN_NdeI_FW             | AAACATATGCAAGACATCATCGA<br>CGCCG       | 1. 98°C, 0:30 min<br>2. 98°C, 0:10 min<br>3. 60°C, 0:30 min<br>4. 72°C, *<br>5. 72°C, 5:00 min<br>(Steps 2-4 × 34)        |
| KP28                                                       | kirN_HindIII_RV          | AAAAAGCTTTTCATTTGTTTCCCTT<br>CCCTGTAGG |                                                                                                                           |
| KP29                                                       | kirM_NdeI_FW             | AAACATATGAGCCAACCCGATGT<br>GATGACC     |                                                                                                                           |
| KP30                                                       | kirM_HindIII_RV          | AAAAAGCTTTCAGACTCGGACGG<br>CGAC        |                                                                                                                           |
| KP31                                                       | kirHVI_NdeI_FW           | AAACATATGACCGACGAAGACC<br>TCGTACCG     |                                                                                                                           |
| KP32                                                       | kirHVI_HindIII_RV        | AAAAAGCTTTC AACCGGCGCGCT<br>CGG        |                                                                                                                           |
| KP33                                                       | kirOI_HindIII_pGM1190_FW | AAAAAGCTTGTGTCCGAGACCGT<br>TCGTCCCCG   |                                                                                                                           |
| KP34                                                       | kirOI_EcoRI_pGM1190_RV   | AAAGAATTCTCACCATGTCACCG<br>GCAGCTCG    |                                                                                                                           |
| KP35                                                       | kirOII_NheI_FW           | AAAGCTAGCGTGACCGGAACATT<br>CGATTGGACG  |                                                                                                                           |
| KP36                                                       | kirOII_HindIII_RV        | AAAAAGCTTTCACACGAGCTGGA<br>CGGGCAG     |                                                                                                                           |
| <b>Control PCRs and sequencing</b>                         |                          |                                        |                                                                                                                           |
| KP37                                                       | kirLEFT_pGUS_seq_FW      | GCTCGAATTCGAAGCTTCTGCAG                | 1. 95°C, 3:00 min<br>2. 95°C, 0:30 min<br>3. 61°C, 0:30 min<br>4. 72°C, 2:15 min<br>5. 72°C, 5:00 min<br>(Steps 2-4 × 40) |
| KP38                                                       | kirRIGHT_pGUS_seq_RV     | GATAAGCATTACCCTGTTATCCC<br>TAG         |                                                                                                                           |
| KP39                                                       | apra-up                  | AGCTTCTCAACCTTGG                       | 1. 94°C, 2:00 min<br>2. 94°C, 1:00 min<br>3. 50°C, 1:00 min<br>4. 72°C, 1:00 min<br>5. 72°C, 5:00 min<br>(Steps 2-4 × 30) |
| KP40                                                       | apra-low                 | TCCGCCAAGGCAAAGC                       |                                                                                                                           |

| ID   | Primer name         | Sequence (5' - 3')               | PCR program                                                                                                               |
|------|---------------------|----------------------------------|---------------------------------------------------------------------------------------------------------------------------|
| KP41 | oxy1                | GCAAAGGAGAGCGTTGTGTC             | 1. 94°C, 2:00 min<br>2. 94°C, 1:00 min<br>3. 60°C, 1:00 min<br>4. 72°C, 1:10 min<br>5. 72°C, 5:00 min<br>(Steps 2-4 × 30) |
| KP42 | oxy2                | TGGTCTCCGTTACCATGTC              |                                                                                                                           |
| KP43 | kirOII_check_FW     | GCGATTGGGGATCTTGGTGA             |                                                                                                                           |
| KP44 | kirOII_check_RV     | ATGGAAACGGTGGTCACACG             |                                                                                                                           |
| KP45 | kirM_int-500bp_FW   | CCACCCTGTCCGGTCGCGG              |                                                                                                                           |
| KP46 | kirM_int-500bp_RV   | GCATCGTCCGCAGCCGCTG              | 1. 95°C, 3:00 min<br>2. 95°C, 0:30 min<br>3. 64°C, 0:30 min<br>4. 72°C, 2:30 min<br>5. 72°C, 5:00 min<br>(Steps 2-4 × 40) |
| KP47 | kirN_int-500bp_FW   | GTGTTGCGGTGGAACCCCGG             |                                                                                                                           |
| KP48 | kirN_int-500bp_RV   | GGGATCCTCCCCACCCGTG              |                                                                                                                           |
| KP49 | kirHIV_int-500bp_FW | CCTGGTGGAGGCCGACAACG             |                                                                                                                           |
| KP50 | kirHIV_int-500bp_RV | CGCCTCGGCGAGTTCGGCG              |                                                                                                                           |
| KP51 | kirHV_int-500bp_FW  | GCATGAACTCCGTGCCCCAGG            |                                                                                                                           |
| KP52 | kirHV_int-500bp_RV  | GCCGCCCGGTCAGTGCACG              |                                                                                                                           |
| KP53 | kirHVI_int-500bp_FW | TGGAGGAGTTCCTGGACCCCG            |                                                                                                                           |
| KP54 | kirHVI_int-500bp_RV | CGCCGTGATACAGACCGCCG             |                                                                                                                           |
| KP55 | kirOI_int-500bp_FW  | CGAGGAAGGCGGACCCACCG             |                                                                                                                           |
| KP56 | kirOI_int-500bp_RV  | GCGTCTCCCTCGGTGAAGTGGTG          |                                                                                                                           |
| KP57 | kirOII_int-500bp_FW | GACGGACCTCGTCGCCGGG              |                                                                                                                           |
| KP58 | kirOII_int-500bp_RV | GAGCTGGATCTGGCCGTCTTG            |                                                                                                                           |
| KP59 | pJet_check_FW       | CGACTCACTATAGGGAGAGCGG<br>C      |                                                                                                                           |
| KP60 | pJet_check_RV       | AAGAACATCGATTTTCCATGGCA<br>G     |                                                                                                                           |
| KP61 | pGM1190_seq_FW      | CACGCGGAACGTCCGGG                |                                                                                                                           |
| KP62 | pGM1190_seq_RV      | CCGCTGAAACTGTTGAAAGTTGT<br>TTAGC |                                                                                                                           |
| KP63 | pRM4_seq_FW         | CAGTCACGACGTTGAAAACGAC<br>GG     |                                                                                                                           |
| KP64 | pRM4_seq_RV         | GGCACCGCGATGCTGTTGTG             |                                                                                                                           |

\* 0:15 min for *kirHV*. 0:30 min for *kirM/kirHIV/kirHVI*. 0:45 min for *kirN/kirOI/kirOII*.

\*\* 1:00 min for *kirM/kirHVI*. 1:30 min for *kirN/kirOI/kirOII*.



**Table S3: HPLC-ESI-HRMS data for kirromycin and derivatives**

| Compound                                                                        | RT (min) | m/z for [M-H] <sup>-</sup> | $\Delta m$ (ppm) | Chemical Formula                                               | MS/MS fragment (m/z [M-H] <sup>-</sup> ) | MS/MS fragment (m/z [M+H] <sup>+</sup> ) |
|---------------------------------------------------------------------------------|----------|----------------------------|------------------|----------------------------------------------------------------|------------------------------------------|------------------------------------------|
| Kirromycin (1)*                                                                 | 12.2     | 795.4110                   | -2.6             | C <sub>43</sub> H <sub>60</sub> N <sub>2</sub> O <sub>12</sub> | 499.2451                                 | 501.2578                                 |
| 20-O-demethyl-kirromycin (2, $\Delta kirM$ )                                    | 11.2     | 781.3953                   | 0                | C <sub>42</sub> H <sub>58</sub> N <sub>2</sub> O <sub>12</sub> | 485.2292                                 | 487.2292                                 |
| 30-deoxy-kirromycin (3, $\Delta kirHVI$ )                                       | 12.3     | 779.4177                   | 2.3              | C <sub>43</sub> H <sub>60</sub> N <sub>2</sub> O <sub>11</sub> | 499.2457                                 | 501.2586                                 |
| 5,6-dihydro-kirromycin (4, $\Delta kirOI$ )                                     | 13.6     | 797.4286                   | 1.6              | C <sub>43</sub> H <sub>62</sub> N <sub>2</sub> O <sub>12</sub> | 501.2634                                 | 503.2768                                 |
| 30-hydroxy-5,6-dehydro-1-N-demethyl-16-deoxy-kirrothricin (5, $\Delta kirOII$ ) | 13.5     | 763.4213                   | -2.7             | C <sub>43</sub> H <sub>60</sub> N <sub>2</sub> O <sub>10</sub> | 467.2548                                 | 469.2698                                 |

\* $\Delta kirN(kirHVI$ -complemented),  $\Delta kirHIV$ , and  $\Delta kirHV$  had similar chromatograms and MS profiles to those of the wild type kirromycin (1), albeit production was lowered in  $\Delta kirN(kirHVI$ -complemented).

### **Table S4: <sup>1</sup>H NMR spectra and assignments**

<sup>1</sup>H nuclear magnetic resonance (NMR) (**A**) and <sup>13</sup>C NMR data (**B**) for 30-deoxy-kirromycin (**3**, kirromycin- $\Delta$ *kirHVI*), 5,6-dihydro-kirromycin (**4**, kirromycin- $\Delta$ *kirOI*), and 30-hydroxy-5,6-dehydro-1-*N*-demethyl-16-deoxy-kirrothricin (**5**, kirromycin- $\Delta$ *kirOII*) in CD<sub>3</sub>OD at resonance frequency <sup>1</sup>600 resp. 150.8 MHz or <sup>2</sup>700 resp. 176.1 MHz. The chemical shifts, obtained from NMR spectroscopy analysis, are represented by  $\Delta$  ppm

|                 | <b>30-deoxy-kirromycin</b><br>( <b>3</b> , from $\Delta kirHVT$ ) |                  | <b>5,6-dihydro-kirromycin</b><br>( <b>4</b> , from $\Delta kirOI$ ) |                           | <b>30-hydroxy-5,6-dehydro-1-N-demethyl-16-deoxy-kirrothricin</b> ( <b>5</b> , from $\Delta kirOII$ )                           |                                              |
|-----------------|-------------------------------------------------------------------|------------------|---------------------------------------------------------------------|---------------------------|--------------------------------------------------------------------------------------------------------------------------------|----------------------------------------------|
| <b>Position</b> | $\delta_H$ [ppm] (Integral, Type, J in Hz) <sup>2)</sup>          | $\delta_C$ [ppm] | $\delta_H$ [ppm] (Integral, Type, J in Hz) <sup>1)</sup>            | $\delta_C$ [ppm]          | $\delta_H$ [ppm] (Integral, Type, J in Hz) <sup>2)</sup>                                                                       | $\delta_C$ [ppm]                             |
| <b>1</b>        |                                                                   | -                | -                                                                   | -                         | -                                                                                                                              | -                                            |
| <b>2</b>        |                                                                   | 164.5            | -                                                                   | n.d.                      | -                                                                                                                              | 164.5                                        |
| <b>3</b>        | -                                                                 | 112.5            | -                                                                   | 79.5 <sup>00</sup>        | -                                                                                                                              | 112.72<br>112.64                             |
| <b>4</b>        | -                                                                 | 169.4            | -                                                                   | 169.8                     | -                                                                                                                              | 169.18, 169.01                               |
| <b>5</b>        | 6.11, 1H, s, br                                                   | 102.1            | 2.54, 1H, dd, $J = 7.0$ (br)                                        | 37.3<br>(br) <sup>#</sup> | 6.12, 1H, d, $J = 7.4$                                                                                                         | 102.0                                        |
| <b>6</b>        | 7.39, 1H, br                                                      | 137.8            | 3.42, 1H, m, $J = 7.0$ (br)                                         | 37.9                      | 7.40, 1H, d, $J = 7.4$                                                                                                         | 137.8                                        |
| <b>7</b>        | -                                                                 | 198.9            | -                                                                   | n.d.                      | -                                                                                                                              | 198.55, 198.63                               |
| <b>8</b>        | -                                                                 | 141.4            | -                                                                   | 138.8 <sup>00</sup>       | -                                                                                                                              | 142.9                                        |
| <b>9</b>        | 6.94, 1H, br                                                      | 142.5            | 6.20, m                                                             | 134.3 <sup>00</sup>       | 6.97, 1H, ddd, $J = 11.4, 5.3, 1.2$                                                                                            | 143.3                                        |
| <b>10</b>       | 6.69, 1H, b, dd, $J = 12.5, 12.5$                                 | 129.4            | 6.56, m <sup>00</sup>                                               | 129.3                     | 6.73, 1H, dd, $J = 11.4, 14.7$                                                                                                 | 129.5                                        |
| <b>11</b>       | 6.07, 1H, dd, $J = 15.1, 7.2$                                     | 137.0            | 6.56, m <sup>00</sup>                                               | 137.2 <sup>00</sup>       | 6.67, 1H, d, $J = 14.7, 10.7$                                                                                                  | 142.3                                        |
| <b>12</b>       | 6.45, 1H, dd, $J = 15.0, 11.0$                                    | 133.6            | 6.40, 1H, $J = 11.5, 15.0$                                          | 133.9<br>(br)             | 6.61, 1H, dd, $J = 14.7, 10.7$                                                                                                 | 142.5                                        |
| <b>13</b>       | 6.52, 1H, m (with 24)                                             | 136.1            | 5.99, m                                                             | 135.1<br>(br)             | 6.46, 1H, dd, $J = 10.5, 5.9$<br>6.44, 1H, dd, $J = 10.6, 5.7$                                                                 | 138.7<br>134.0                               |
| <b>14</b>       | 4.31, 1H, m                                                       | 81.6             | 4.25, 1H, dd, $J = 12.5$                                            | 81.8                      | 6.37, 0.6 H, dd, $J = 14.7, 10.5$                                                                                              | 132.1                                        |
| <b>15</b>       | 4.32, 1H, m                                                       | 75.0             | 4.28, 1H, dd, $J = 12.5$                                            | 75.0                      | 5.90, 0.4 H, dt, $J = 14.9, 7.4$ ;<br>6.26, 0.6H dd, $J = 14.8, 10.4$<br>(also 6.21, dd, $J = 11.3, 11.3, 5.67, m,$ ; 6.78, m) | 136.02<br>133.50<br>(131.1, 132.2,<br>133.5) |
| <b>16</b>       | 4.19, 1H, dd, $J = 4.4$                                           | 74.0             | 4.17, 1H, dd, $J = 4.4$                                             | 74.0                      | 2.25, m<br>2.40, m<br>2.43, m                                                                                                  | 40.0, 40.7,<br>34.8                          |

|                 | <b>30-deoxy-kirromycin</b><br>( <b>3</b> , from $\Delta kirHVT$ ) |                  | <b>5,6-dihydro-kirromycin</b><br>( <b>4</b> , from $\Delta kirOI$ ) |                  | <b>30-hydroxy-5,6-dehydro-1-N-demethyl-16-deoxy-kirrothricin</b> ( <b>5</b> , from $\Delta kirOII$ ) |                  |
|-----------------|-------------------------------------------------------------------|------------------|---------------------------------------------------------------------|------------------|------------------------------------------------------------------------------------------------------|------------------|
| <b>Position</b> | $\delta_H$ [ppm] (Integral, Type, J in Hz) <sup>2)</sup>          | $\delta_C$ [ppm] | $\delta_H$ [ppm] (Integral, Type, J in Hz) <sup>1)</sup>            | $\delta_C$ [ppm] | $\delta_H$ [ppm] (Integral, Type, J in Hz) <sup>2)</sup>                                             | $\delta_C$ [ppm] |
| <b>17</b>       | 3.71, 1H, dd, $J=7.3, 4.1$                                        | 85.0             | 3.68, 1H, dd, $J=4.0, 7.5$                                          | 84.9             | 4.06, 1H, m                                                                                          | 70.9             |
| <b>18</b>       | -                                                                 | -                | -                                                                   | -                | -                                                                                                    | -                |
| <b>19</b>       | 2.20, 1H, m                                                       | 36.8             | 2.16, 1H, ddq, $J=2.0, 7.0$                                         | 36.8             | 1.69, 1H, m                                                                                          | 40.8             |
| <b>20</b>       | 3.34, 1H, d, 9.2                                                  | 91.9             | 3.32, s                                                             | 91.9             | 3.46, 1H, d, $J=10.1$                                                                                | 90.0             |
| <b>21</b>       | -                                                                 | 136.1            | -                                                                   | 136.0            | -                                                                                                    | 136.7            |
| <b>22</b>       | 5.69, 1H, dd, $J=15.0, 6.0$                                       | 130.8            | 5.96, 1H, d (br), $J=10$                                            | 130.9            | 5.99, 1H, d, $J=10.5$                                                                                | 130.4            |
| <b>23</b>       | 6.56, 1H, dd, $J=15.2, 11.0$                                      | 128.0            | 6.49, 1H, m, $J=11.0, 16.0$                                         | 128.3            | 6.51, 1H, dd, $J=15.2, 11.0$                                                                         | 128.3            |
| <b>24</b>       | 6.53, 1H, dd, $J=15.2, 11.0$                                      | 128.2            | 5.67, 1H, m, $J=6.0, 16.0$                                          | 131.0            | 5.66, 1H, m (with 35)                                                                                | 130.6            |
| <b>25a</b>      | 3.90, 1H, dd, $J=15.8, 5.8$                                       | 42.0             | 3.86, 1H, dd, $J=6.5, 15.0$                                         | 42.0             | 3.89, 1H, dd, $J=15.8, 5.5$                                                                          | 42.1             |
| <b>25b</b>      | 3.95, 1H, dd, $J=15.8, 5.9$                                       |                  | 3.93, 1H, dd, $J=6.5, 15.0$                                         |                  | 3.95, 1H, dd, $J=15.8, 6.7$                                                                          |                  |
| <b>26-N</b>     | -                                                                 | -                | -                                                                   | -                | -                                                                                                    | -                |
| <b>27</b>       | -                                                                 | 176.9            | -                                                                   | 177.9            | -                                                                                                    | 177.9            |
| <b>28</b>       | 2.39, 1H, dd, $J=11.1, 4.2$                                       | 58.3             | 2.82, 1H, dd, $J=4.0, 11.0$                                         | 52.5             | 2.84, 1H, dd, $J=11.0, 4.5$                                                                          | 52.5             |
| <b>29</b>       | -                                                                 | 99.5             | -                                                                   | 101.0            | -                                                                                                    | 101.0            |
| <b>30</b>       | 1.95, 1H, dd, $J=12.6, 4.6$<br>1.48, 1H, dd, $J=12.6, 12.5$       | 38.3             | 3.65, 1H, d, $J=4.0$                                                | 71.4             | 3.68, 1H, d, $J=3.6$                                                                                 | 71.4             |
| <b>31</b>       | 3.74, 1H, d, $J=12.5, 4.6$                                        | 72.6             | 3.57, 1H, d, $J=4.0$                                                | 74.0             | 3.60, 1H, d, $J=3.6$                                                                                 | 74.0             |
| <b>32</b>       | -                                                                 | 40.3             | -                                                                   | 40.0             | -                                                                                                    | 39.9             |
| <b>33</b>       | 4.17, 1H, d, $J=6.0$                                              | 77.7             | 4.21, 1H, d, $J=6.0$                                                | 77.3             | 4.24, 1H, t, $J=5.8$                                                                                 | 77.3             |
| <b>34-O</b>     | -                                                                 | -                | -                                                                   | -                |                                                                                                      |                  |
| <b>35</b>       | 5.64, 1H, m (with 24)                                             | 130.3            | 5.62, 1H, dd, $J=6.0, 15.0$                                         | 130.5            | 5.66, 1H, m (with 24)                                                                                | 130.6            |
| <b>36</b>       | 6.55, 1H, m (with 24)                                             | 127.9            | 6.54, m                                                             | 127.7            | 6.58, 1H, dd, $J=14.8, 11.8$                                                                         | 127.7            |
| <b>37</b>       | 6.01, 1H, ddd, $J=10.8, 10.8,$                                    | 130.4            | 5.99, m                                                             | 130.6            | 6.01, 1H, ddd, $J=10.8, 10.8, 1.5$                                                                   | 130.5            |

|                 | <b>30-deoxy-kirromycin</b><br>( <b>3</b> , from $\Delta kirHVT$ ) |                  | <b>5,6-dihydro-kirromycin</b><br>( <b>4</b> , from $\Delta kirOI$ ) |                  | <b>30-hydroxy-5,6-dehydro-1-N-demethyl-16-deoxy-kirrothricin</b> ( <b>5</b> , from $\Delta kirOII$ ) |                  |
|-----------------|-------------------------------------------------------------------|------------------|---------------------------------------------------------------------|------------------|------------------------------------------------------------------------------------------------------|------------------|
| <b>Position</b> | $\delta_H$ [ppm] (Integral, Type, J in Hz) <sup>2)</sup>          | $\delta_C$ [ppm] | $\delta_H$ [ppm] (Integral, Type, J in Hz) <sup>1)</sup>            | $\delta_C$ [ppm] | $\delta_H$ [ppm] (Integral, Type, J in Hz) <sup>2)</sup>                                             | $\delta_C$ [ppm] |
|                 | 1.0                                                               |                  |                                                                     |                  |                                                                                                      |                  |
| <b>38</b>       | 5.49, 1H, dq, $J = 11.0, 6.9$                                     | 126.5            | 5.44, 1H, dq, $J = 7.0, 11.0$                                       | 126.4            | 5.49, 1H, dq, $J = 11.0, 7.0$                                                                        | 126.4            |
| <b>39</b>       | 1.77, 3H, dd, $J = 7.1, 1.5$                                      | 13.7             | 1.73, 3H, dd, $J = 2.0, 7.0$                                        | 13.7             | 1.77, 3H, dm, $J = 7.0$                                                                              | 13.7             |
| <b>40</b>       | 2.01, 3H,                                                         | 11.7             | 1.95, s (br)                                                        | 14.4 (br)        | 2.00, 2.04, 3H, d, $J = 0.9$                                                                         | 11.61,<br>11.68  |
| <b>41</b>       | 0.84, 3H, d, $J = 6.8$                                            | 13.9             | 0.81, 1H, d, $J = 7.0$                                              | 13.9             | 0.69, 3H, d, $J = 7.0$                                                                               | 9.49,<br>9.57    |
| <b>42</b>       | 3.18, 3H, s                                                       | 56.2             | 3.15, 3H, s (sh)                                                    | 56.2             | 3.17, 3H, s                                                                                          | 56.32            |
| <b>43</b>       | 1.69, 3H, s                                                       | 11.2             | 1.66, 3H, s (sh)                                                    | 11.2             | 1.63, 3H, s                                                                                          | 11.0 (sh)        |
| <b>44</b>       | 1.73, 2H, m                                                       | 21.6             | 1.70, m                                                             | 21.1             | 1.73, 2H, m                                                                                          | 21.1             |
| <b>45</b>       | 0.95, 3H, t, $J = 7.3$                                            | 12.4             | 0.92, 3H, t, $J = 7.5$                                              | 12.3             | 0.95, 3H, t, $J = 7.4$                                                                               | 12.3             |
| <b>46</b>       | 0.77, 3H, s                                                       | 12.4             | 0.89, 3H, s <sup>00</sup>                                           | 15.9             | 0.92, 3H, s                                                                                          | 15.9             |
| <b>47</b>       | 0.94, 3H, s                                                       | 23.0             | 0.89, 3H, s <sup>00</sup>                                           | 24.6             | 0.92, 3H, s                                                                                          | 24.6             |

\*: <sup>13</sup>C shift determined by HSQC or HMBC. #: assigned due to HSQC correlations. <sup>00</sup>: not unambiguously assigned due to tautomerization, missing 2D correlations, or overlaying signals. n.d.: not detected. n.a.: not assigned.

## Figure S1-I – S1-II: UV-VIS profiles of $\Delta kirHIV$ and $\Delta kirHV$ mutants

The  $\Delta kirHIV$  and  $\Delta kirHV$  mutants were grown in parallel with *Streptomyces collinus* Tü 365 (wild type) in kirromycin production medium and extracted with ethyl acetate. The extracts were dried, dissolved in methanol, and analysed using HPLC-ESI-HRMS. The recorded UV profiles of  $\Delta kirHIV$  (I) and  $\Delta kirHV$  (II) (black chromatograms) were similar to those of the wild type (red chromatograms). These results indicate that the two genes *kirHIV* and *kirHV* are not directly involved in the biosynthesis of kirromycin. In the case of  $\Delta kirHV$  (II), we suspect that the lower intensity of the peak at 12.3 min (compared to the wild type) could be explained from almost complete conversion of the pathway intermediate into kirromycin.

(I)

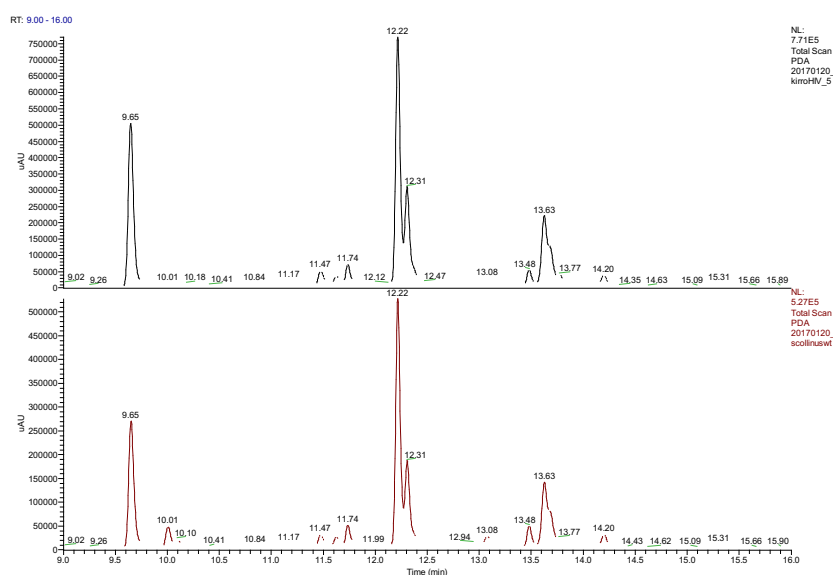

(II)

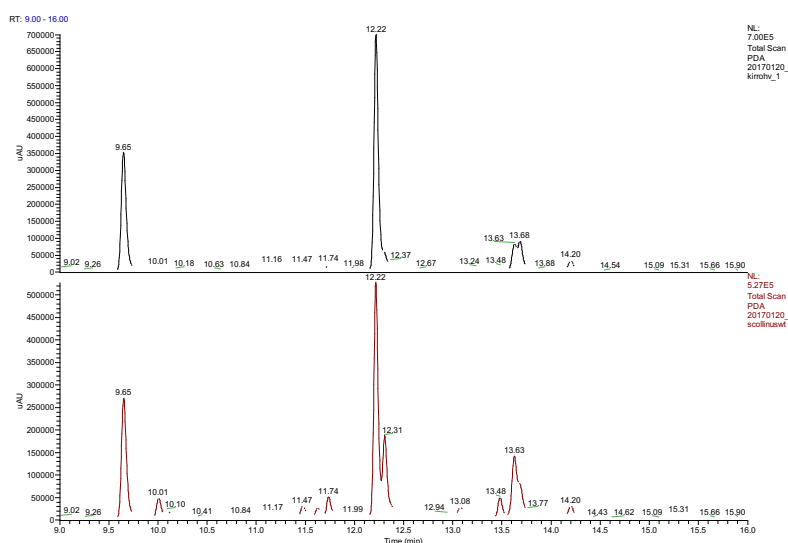

## Figure S2-I – S2-V: MS/MS spectra of kirromycin and derivatives

MS/MS spectra for **(I)** kirromycin (**1**), **(II)** 20-*O*-demethyl-kirromycin (**2**), **(III)** 30-deoxy-kirromycin (**3**), **(IV)** 5,6-dihydro-kirromycin (**4**), and **(V)** 30-hydroxy-5,6-dehydro-1-*N*-demethyl-16-deoxy-kirrothricin (**5**). Recorded in negative mode (ESI-) with higher-energy collisional dissociation (HCD) of 25 eV.

**(I)**

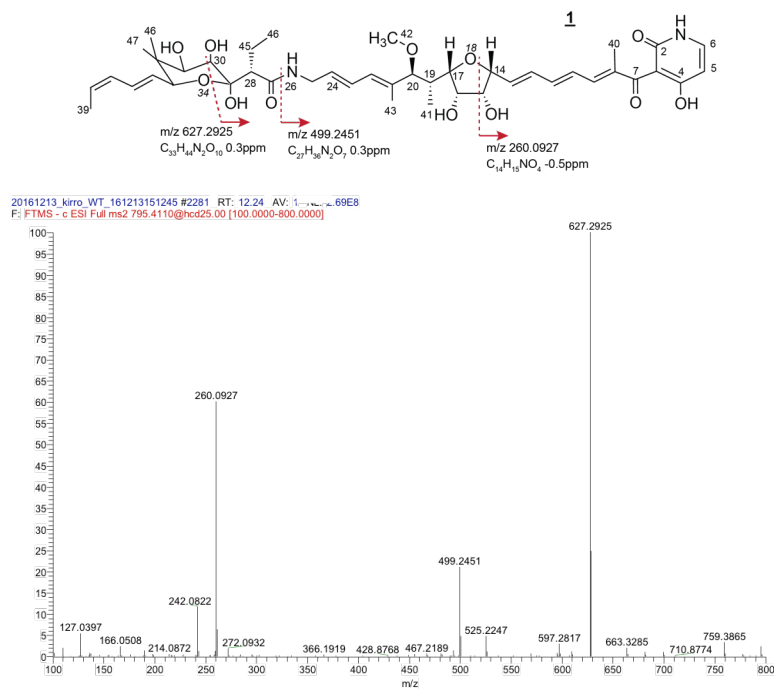

(II)

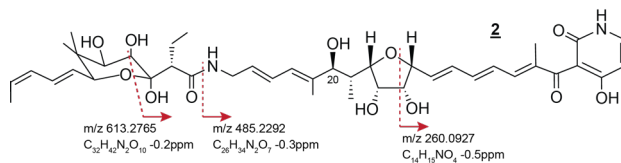

20161213\_kirra\_kirM\_161213154449\_#1678 RT: 11.12 AV: 1.19E8  
F: FTMS - c ESI Full me2 781.3950@rcd25.00 [100.0000-800.0000]

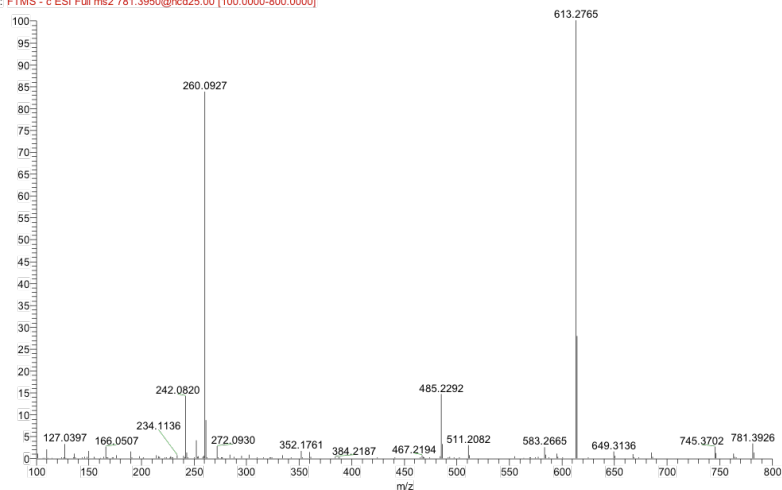

(III)

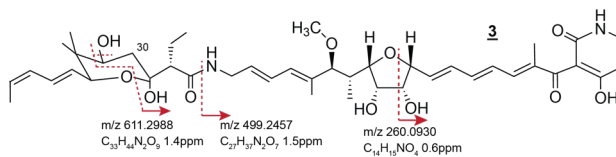

20161202\_kirra\_kirMvineg\_#471 RT: 12.48 AV: 1 NL: 1.20E8  
F: FTMS - c ESI Full me2 779.4170@cs430.00 [206.0000-1000.0000]

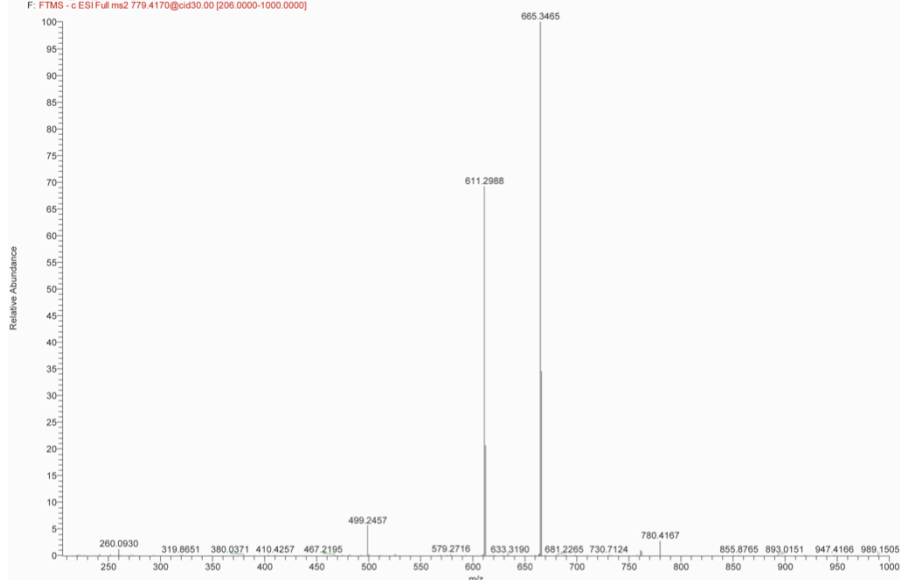



(IV)

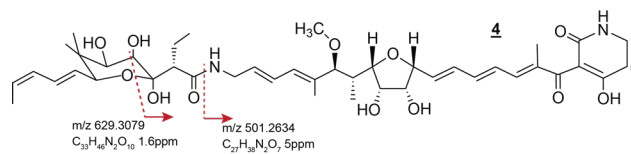

20161213\_kirro-OI\_161213164855 #2839 RT: 13.67 AV: 1 .....J9E8  
F: FTMS - c ESI Full ms2 797.4280@hcd25.00 [100.0000-800.0000]

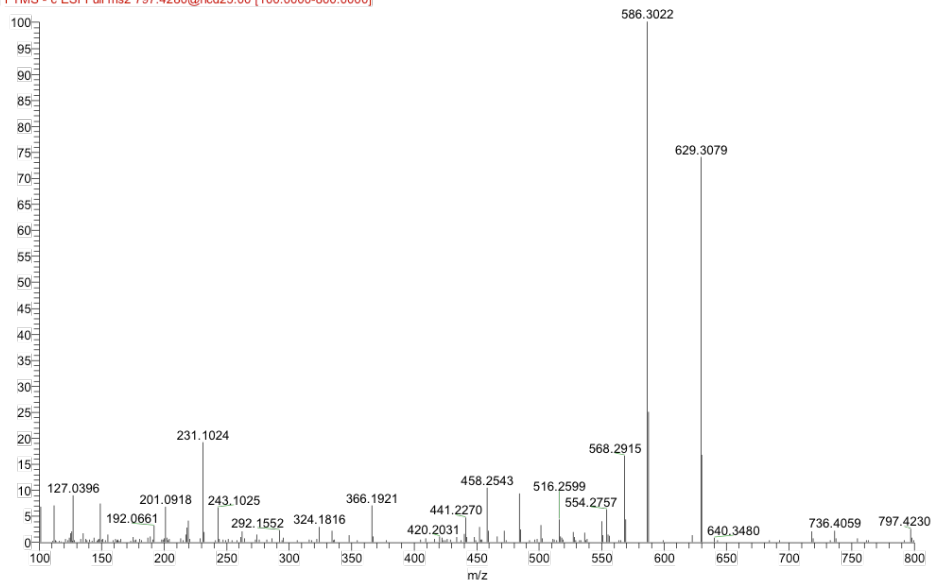

(V)

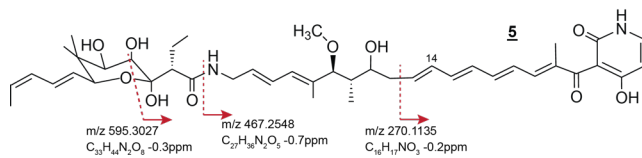

20161213\_kirro-OI\_161213172057 #2616 RT: 13.48 AV: 1 .....85E8  
F: FTMS - c ESI Full ms2 763.4210@hcd25.00 [100.0000-800.0000]

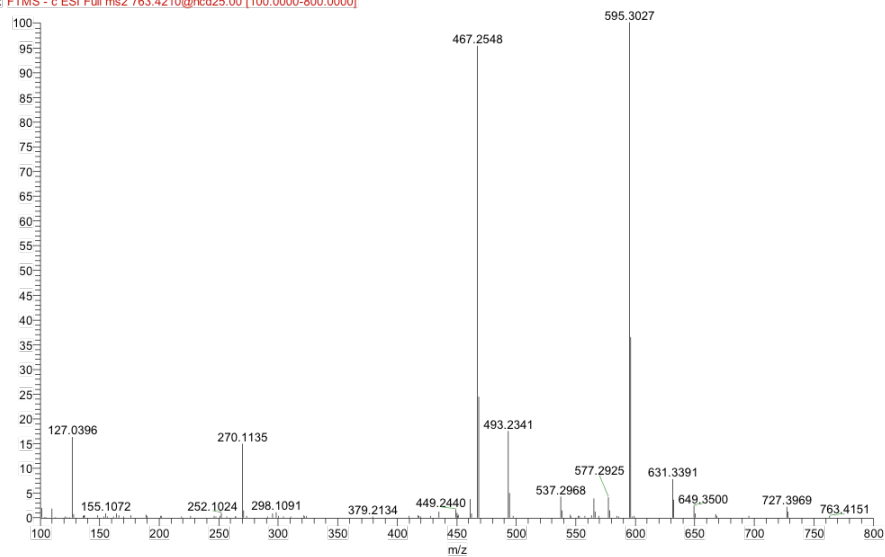

**Figure S3-I – S3-VI: HPLC-ESI-UV-Vis profiles of the wild type (WT),  $\Delta kir$  mutants, and complemented mutants**

UV-Vis profiles of *Streptomyces collinus* Tü 365 (WT) compared to mutants (I)  $\Delta kirM$ , (II)  $\Delta kirHVI$ , (III)  $\Delta kirOI$ , and, (IV)  $\Delta kirOII$ , along with their respective complementations. The  $\Delta kirN$  mutant and its single (*kirHVI*) and double (*kirN+HVI*) complementations are shown in (V) and (VI), respectively.

(I)

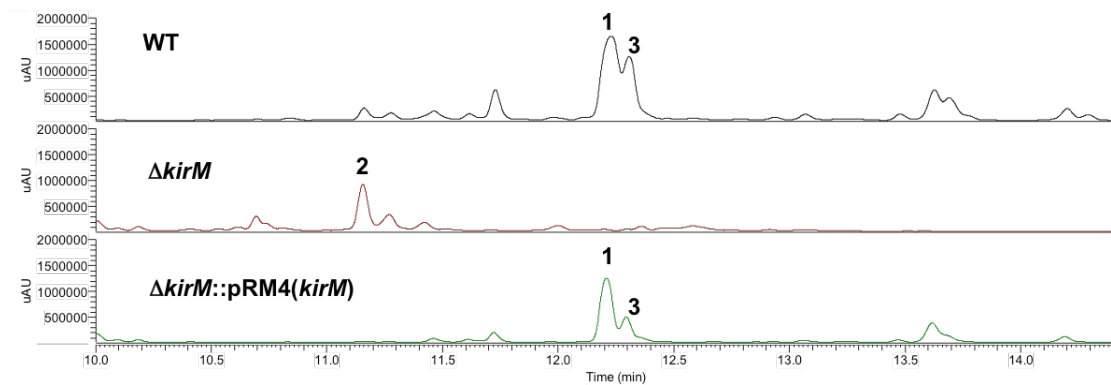

(II)

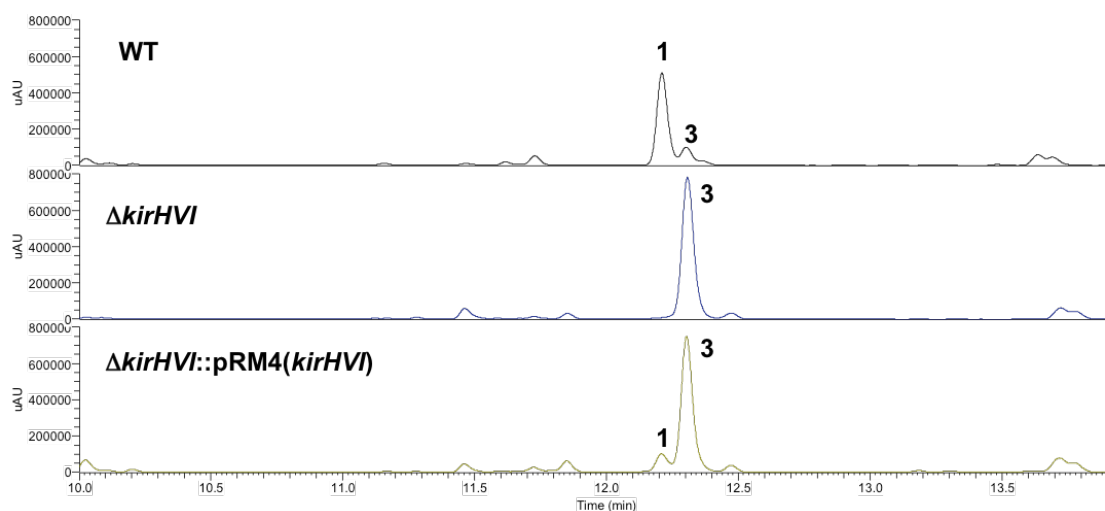

**(III)**

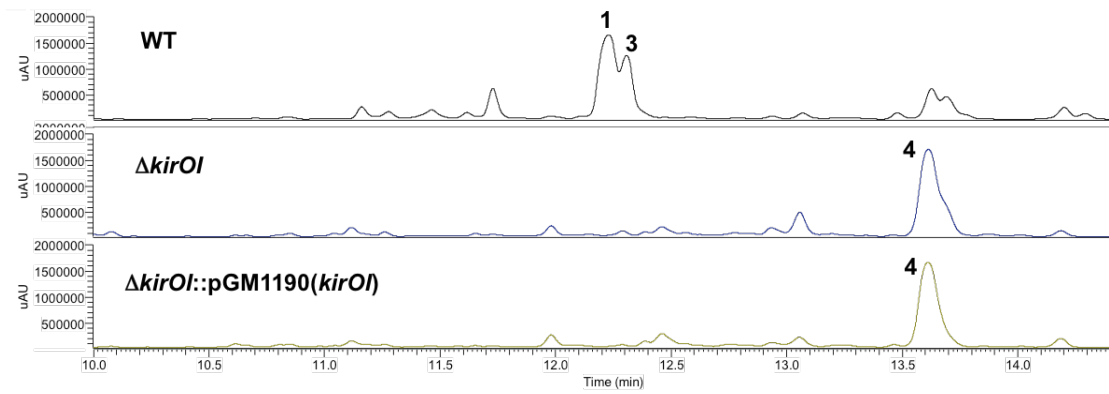

**(IV)**

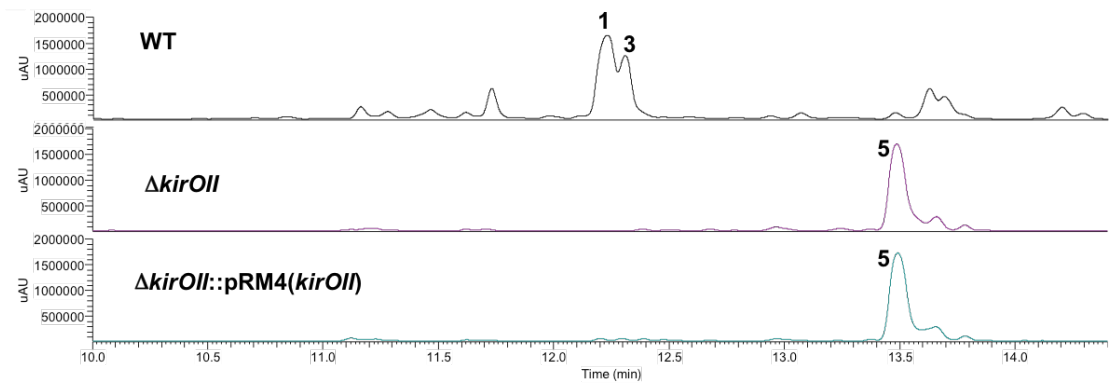

(V)

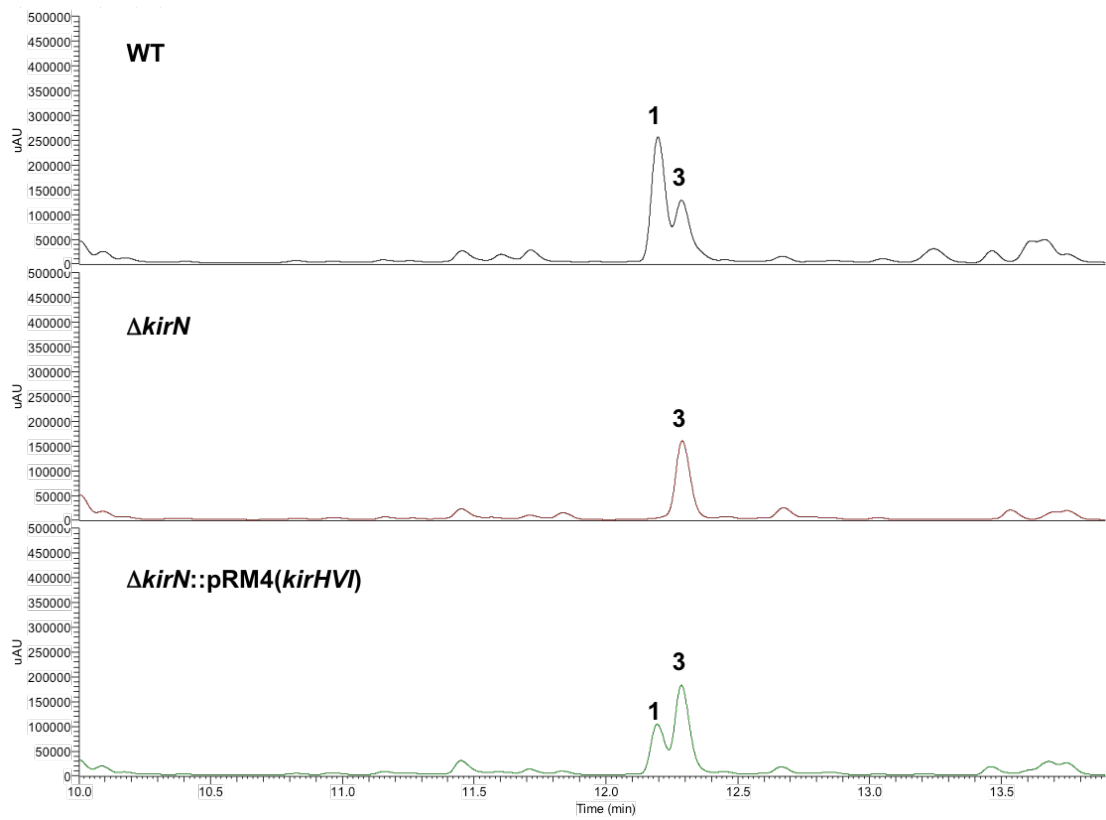

(VI)

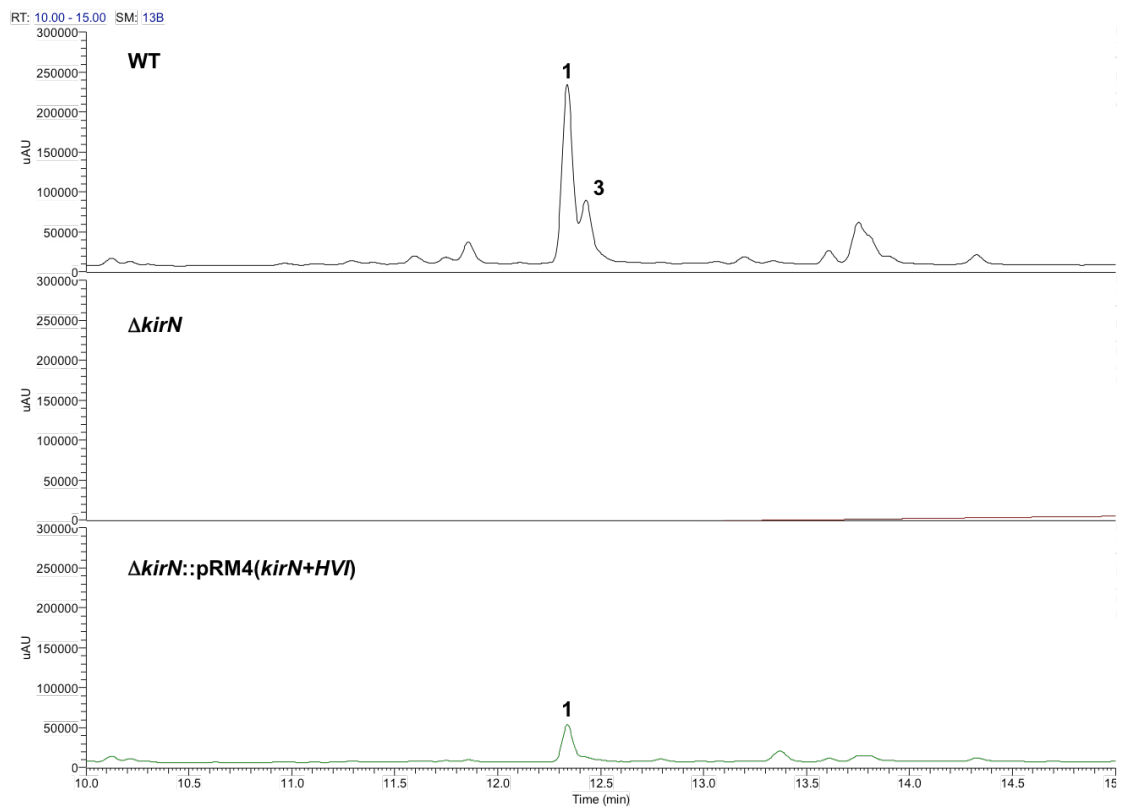

**Figure S4-I – S4-III:  $^1\text{H}$  NMR and  $^{13}\text{C}$  NMR data and assignment for 30-deoxy-kirromycin (3), 5,6-dihydro-kirromycin (4), and 30-hydroxy-5,6-dehydro-1-*N*-demethyl-16-deoxy-kirrothricin (5)**

(A)  $^1\text{H}$  NMR and (B)  $^{13}\text{C}$  NMR of (I) 30-deoxy-kirromycin (3), (II) 5,6-dihydro-kirromycin (4), and (III) 30-hydroxy-5,6-dehydro-1-*N*-demethyl-16-deoxy-kirrothricin (5) ( $\text{CD}_3\text{OD}$ , 298 K). Resonance frequency  $^1$  600 resp. 150.8 MHz,  $^2$  700 resp. 176.1 MHz.

**(IA)  $^1\text{H}$  NMR spectrum of 3**

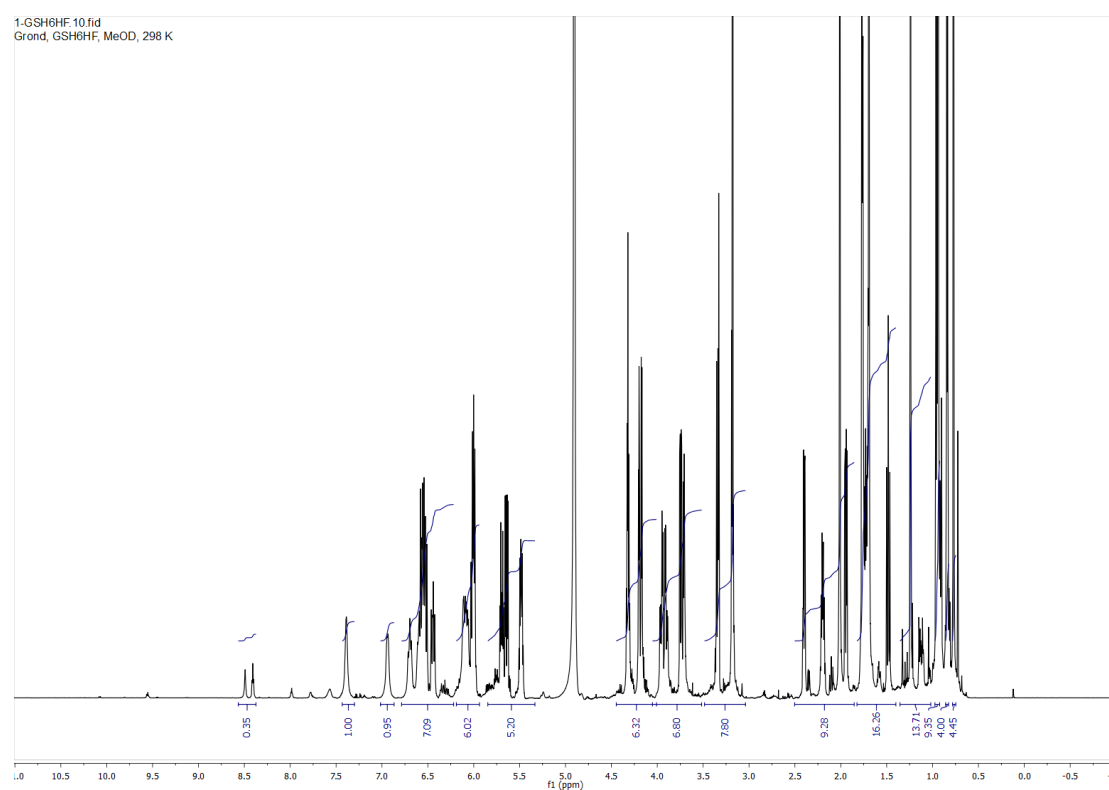

### (IB) $^{13}\text{C}$ NMR spectrum of 3

1-GSH6HF\_14.fid  
Grond, GSH6HF, MeOD, 298 K

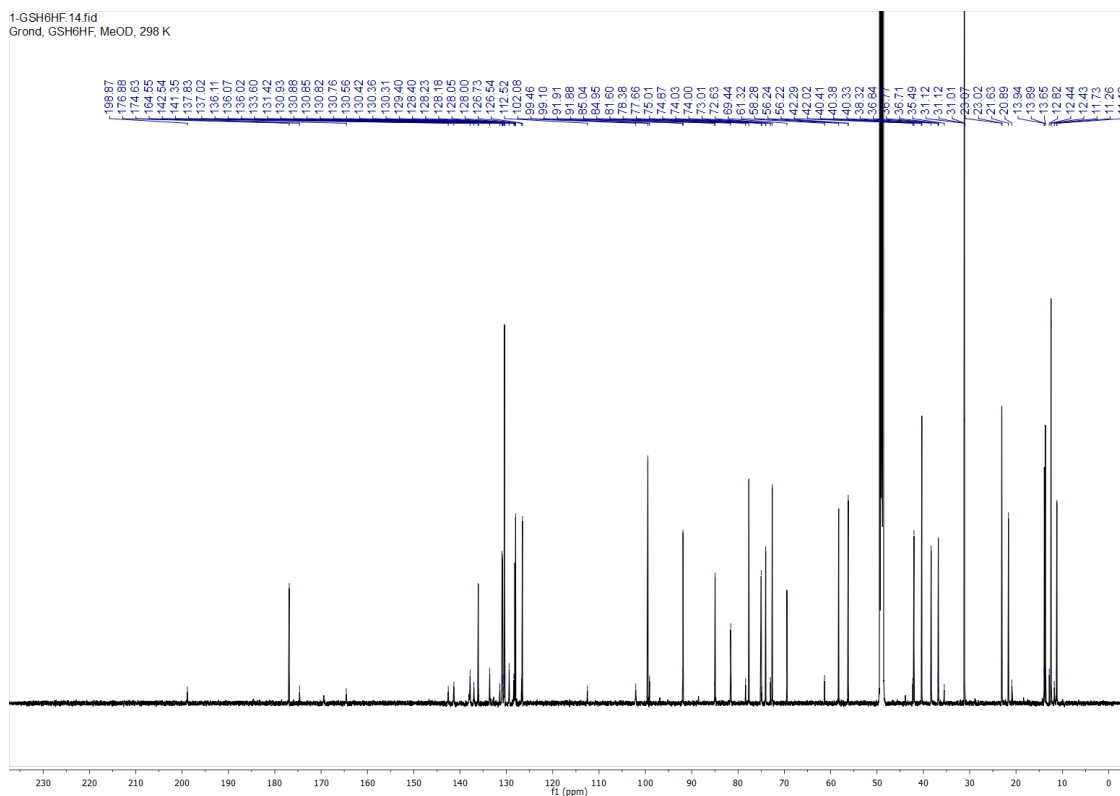

### (IIA) $^1\text{H}$ NMR spectrum of 4

Grond, GS TAKIKID59\_gh, MeOD, 298K

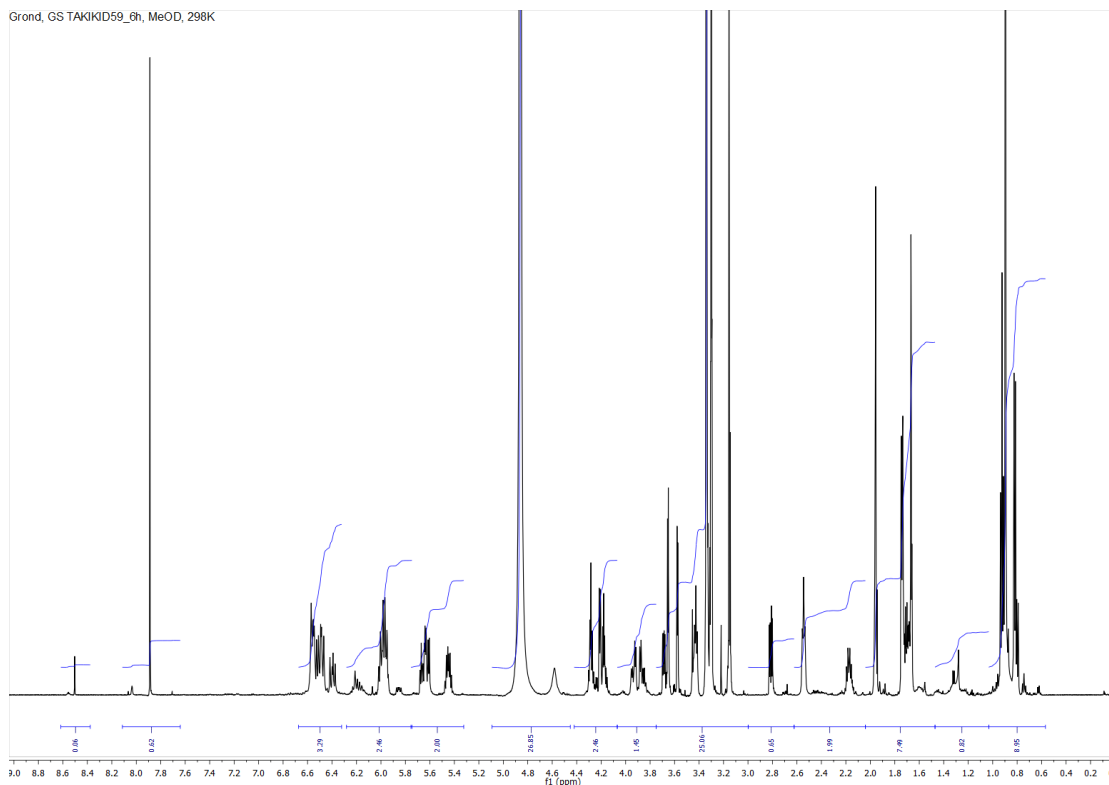

### (IIB) $^{13}\text{C}$ NMR spectrum of 4

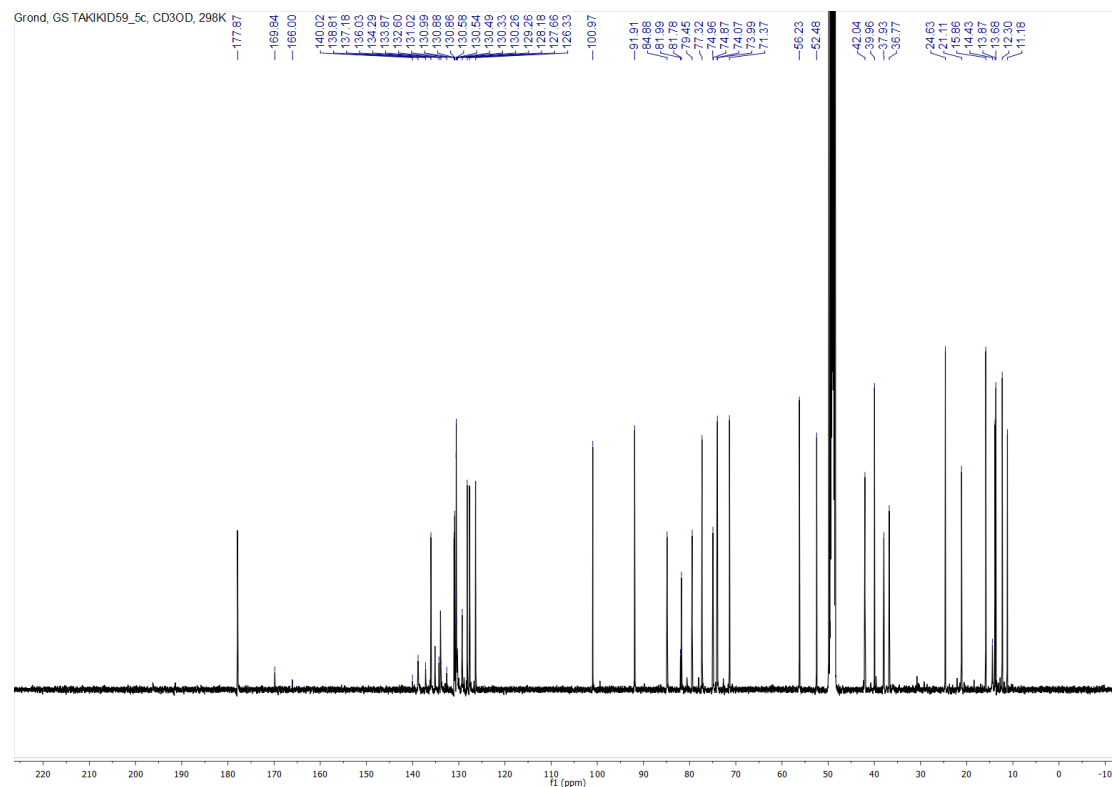

### (IIIA) $^1\text{H}$ NMR spectrum of 5

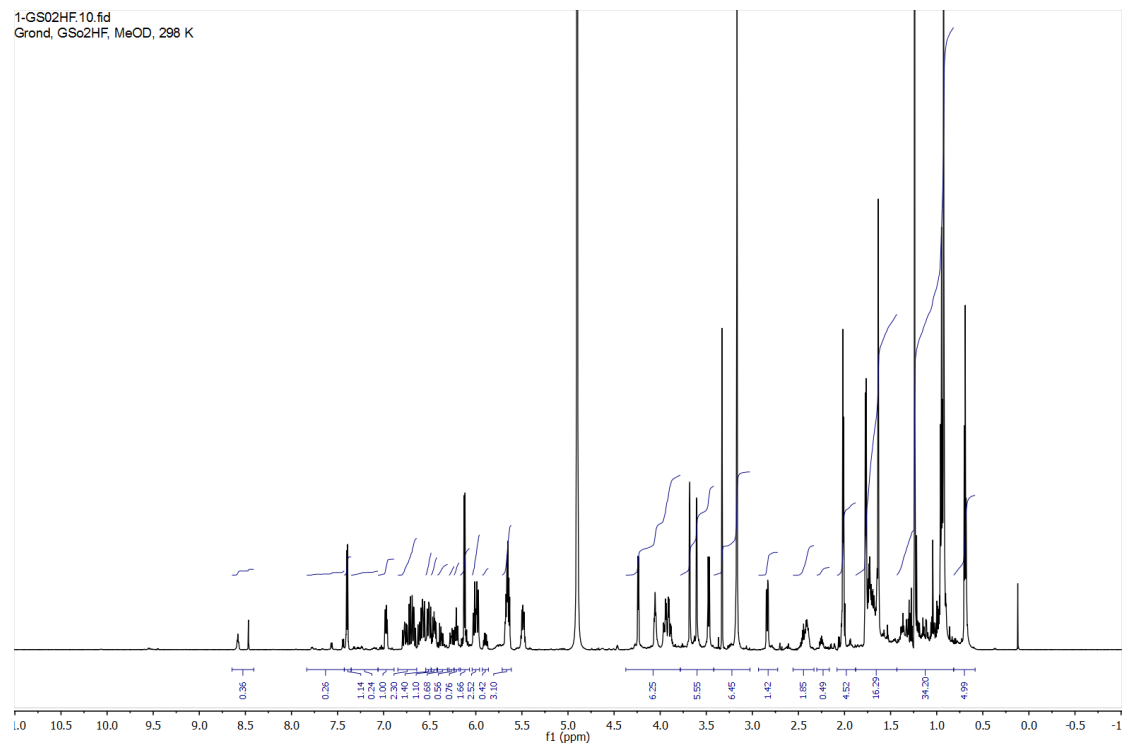

# (IIB) <sup>13</sup>C NMR spectrum of 5

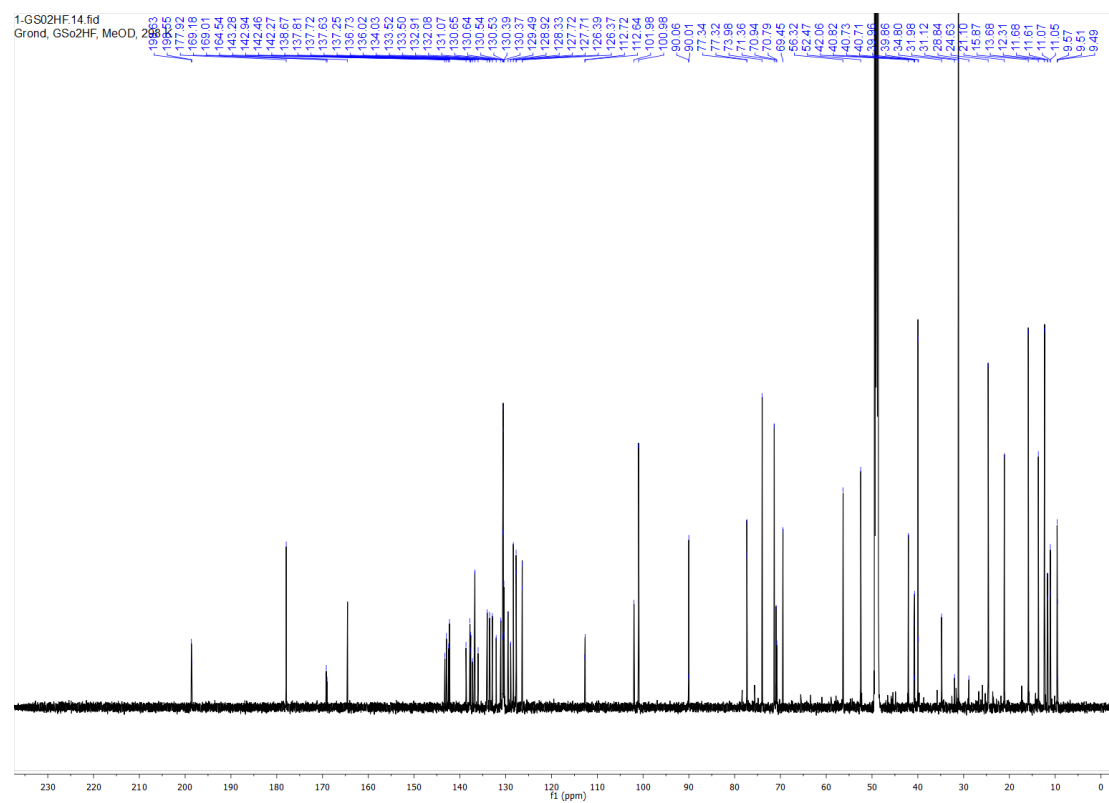



**Figure S5-I – S5-III: 2D-NMR of 30-deoxy-kirromycin (3), 5,6-dihydro-kirromycin (4), and 30-hydroxy-5,6-dehydro-1-*N*-demethyl-16-deoxy-kirrothricin (5)**

**(I) 30-deoxy-kirromycin (3)**

Homonuclear Correlation Spectroscopy (COSY) underlined the partial structure for the 30-deoxygenated pyran ring in 30-deoxy-kirromycin (**3**) (**IA** and **ID**), which was isolated from the  $\Delta kirHVI$  mutant. It lacked the C-30-hydroxy group as had been found previously for the heneicomycin analogue<sup>9</sup>. The signal for H-30<sub>a</sub> ( $\delta$  1.48) showed strong cross correlation with the H-30<sub>b</sub> ( $\delta$  1.95), and both exhibited further correlations with H-31 ( $\delta$  3.74). (**IB**) The Heteronuclear Single Quantum Correlation (HSQC) gave evidence to the CH<sub>2</sub>-connectivity for both H-30<sub>a</sub> and H-30<sub>b</sub> connection attached to one carbon atom (C-30, ( $d_C$  = 38.3). (**IC**) The Heteronuclear Multiple Bond Correlation (HMBC) spectrum showed correlations between H-30<sub>a</sub> ( $\delta$  1.48), H-30<sub>b</sub> ( $\delta$  1.95) and C-29 ( $\delta$  99.5) and corroborated the 30-deoxy ring in **3**.

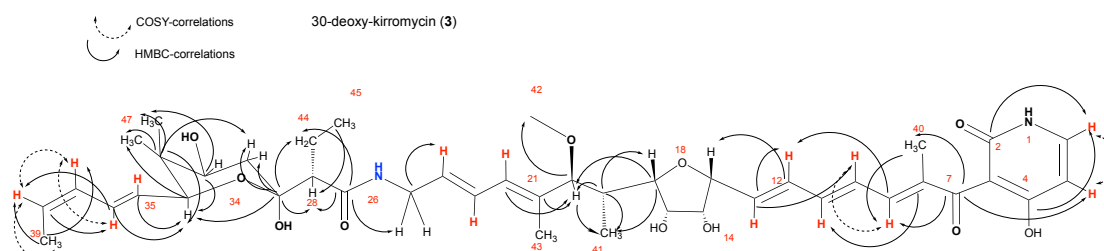

**Formula S5-I** Selected COSY (double dashed arrowed), TOCSY (dashed line), and HMBC (single arrowed) correlations for 30-deoxy-kirromycin (**3**).

**(IA) H-H-correlation (COSY) spectrum of 30-deoxy-kirromycin (3)**

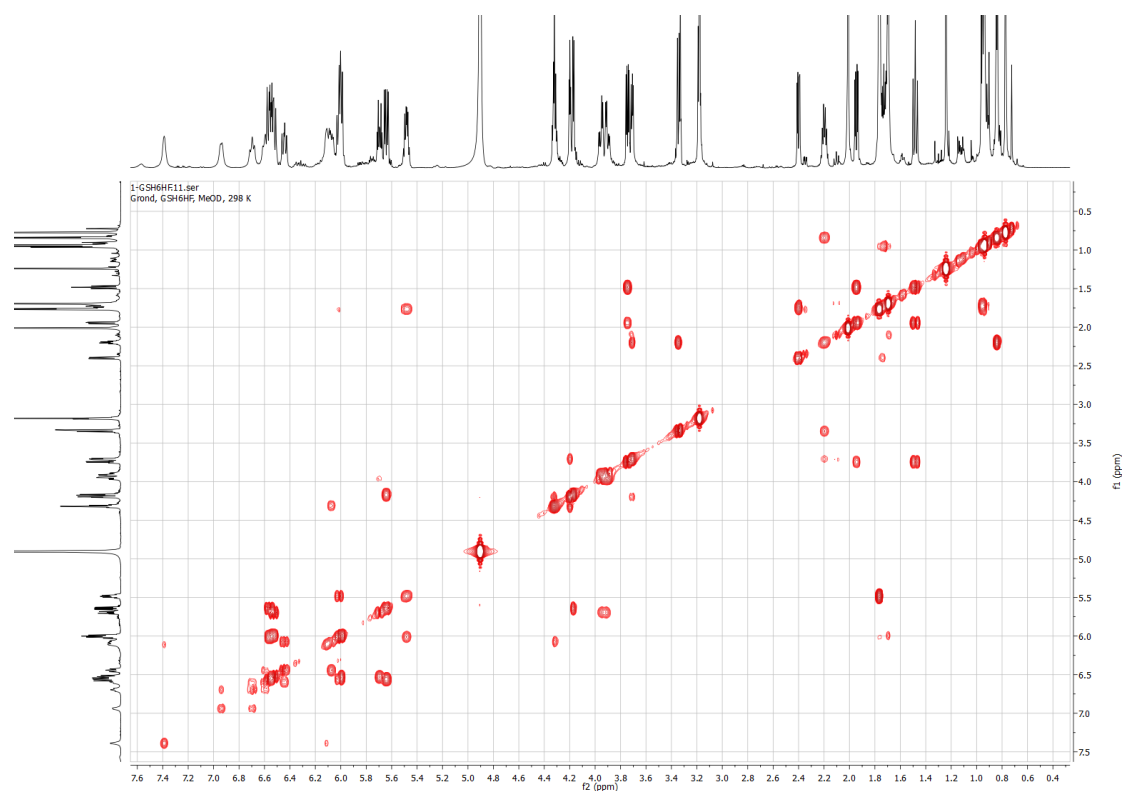

**(IB) CH-correlation (HSQC) spectrum of 30-deoxy-kirromycin (3)**

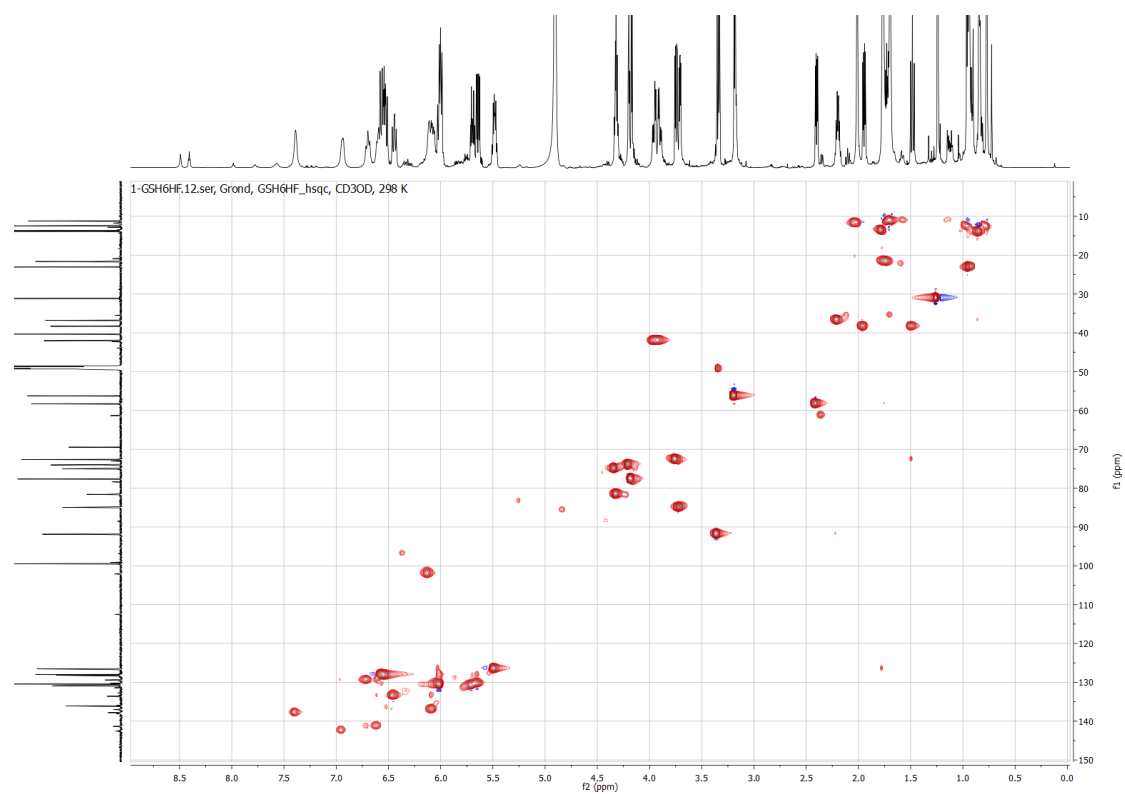

**(IC) Multiple bond CH-correlation (HMBC) spec. of 30-deoxy-kirromycin (3)**

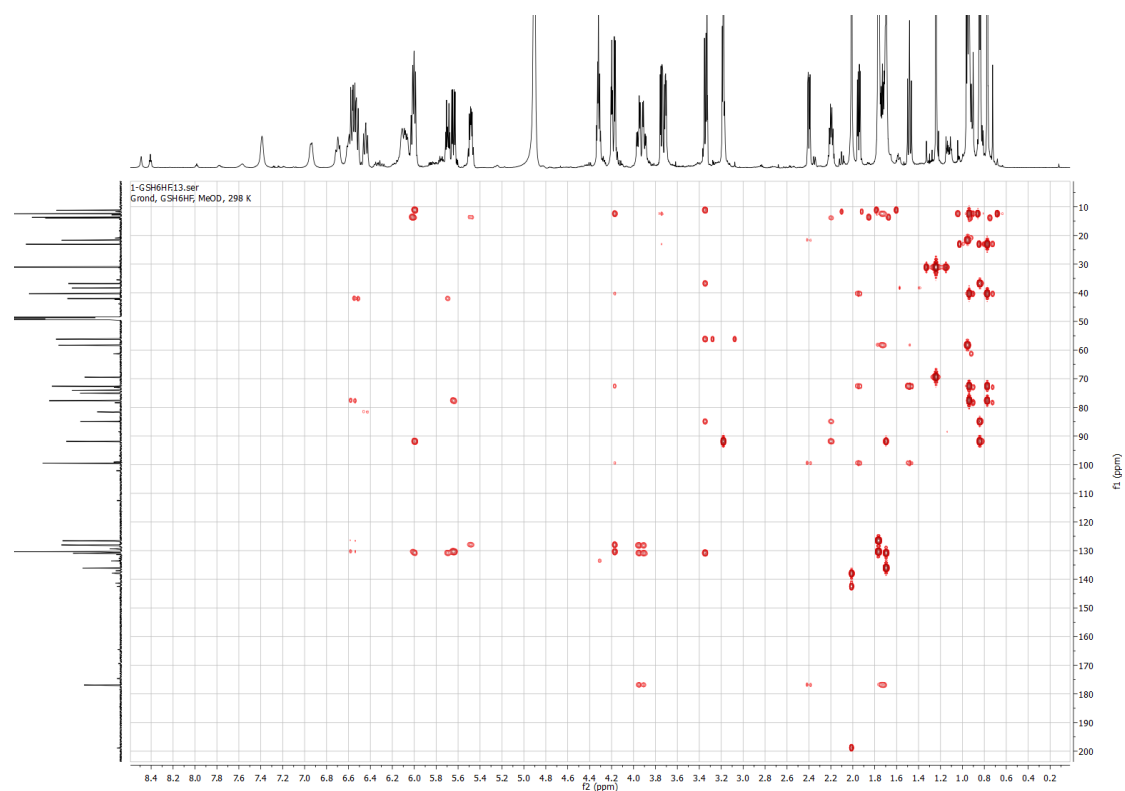

**(ID) Key correlations highlighted for 30-deoxy-kirromycin (3)**

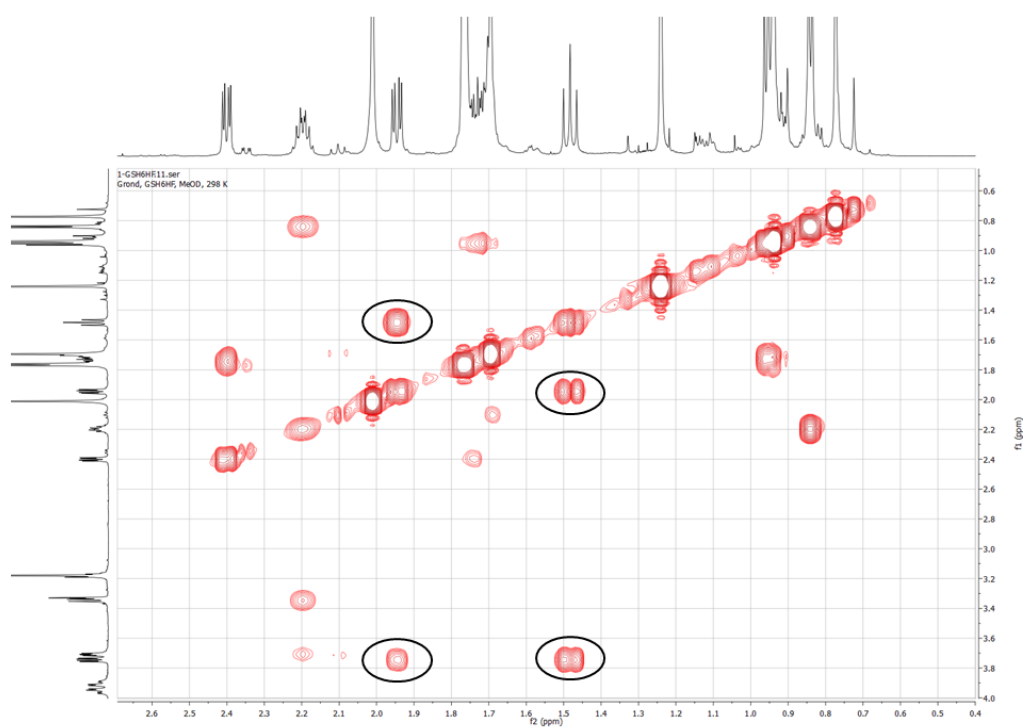

## (II) 5,6-dihydro-kirromycin (4)

(IIA) In addition to the one-dimensional  $^1\text{H}$  NMR spectra, the COSY spectrum gave evidence for the two additional methylene groups 5- $\text{H}_2$  ( $\delta$  2.54, t, broad) and 6- $\text{H}_2$  ( $\delta$  3.42, t, broad) with strong correlation signals (IIA and IID) for the 5,6-dihydro-kirromycin (4), isolated from the  $\Delta\text{kirOI}$  mutant. (IIB) The HSQC gave evidence for the C-H connectivity. (IIC) The HMBC spectrum showed significant correlations of the intact kirromycin triene conjugated double bonds, e.g. 22-H ( $\delta$  5.96) with C-19 ( $\delta_{\text{C}}$  91.9) and C-43 ( $\delta_{\text{C}}$  11.2) and C-23 ( $\delta_{\text{C}}$  128.3) and, in addition, the correlation of 33-H ( $\delta$  4.21) with C-36 ( $\delta_{\text{C}}$  127.7).

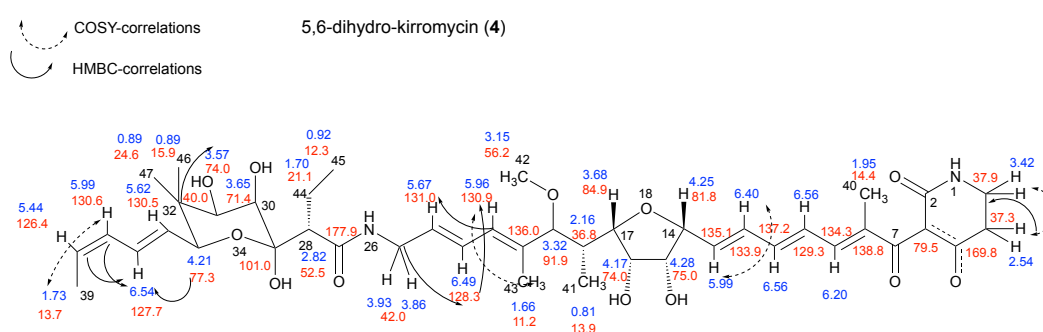

**Formula S5-II** Full assignment of  $^1\text{H}$  and  $^{13}\text{C}$  NMR data as example and selected COSY (double dashed arrowed) and HMBC (single arrowed) correlations for 5,6-dihydro-kirromycin (4).

**(IIA) H-H-correlation (COSY) spectrum of 5,6-dihydro-kirromycin (4)**

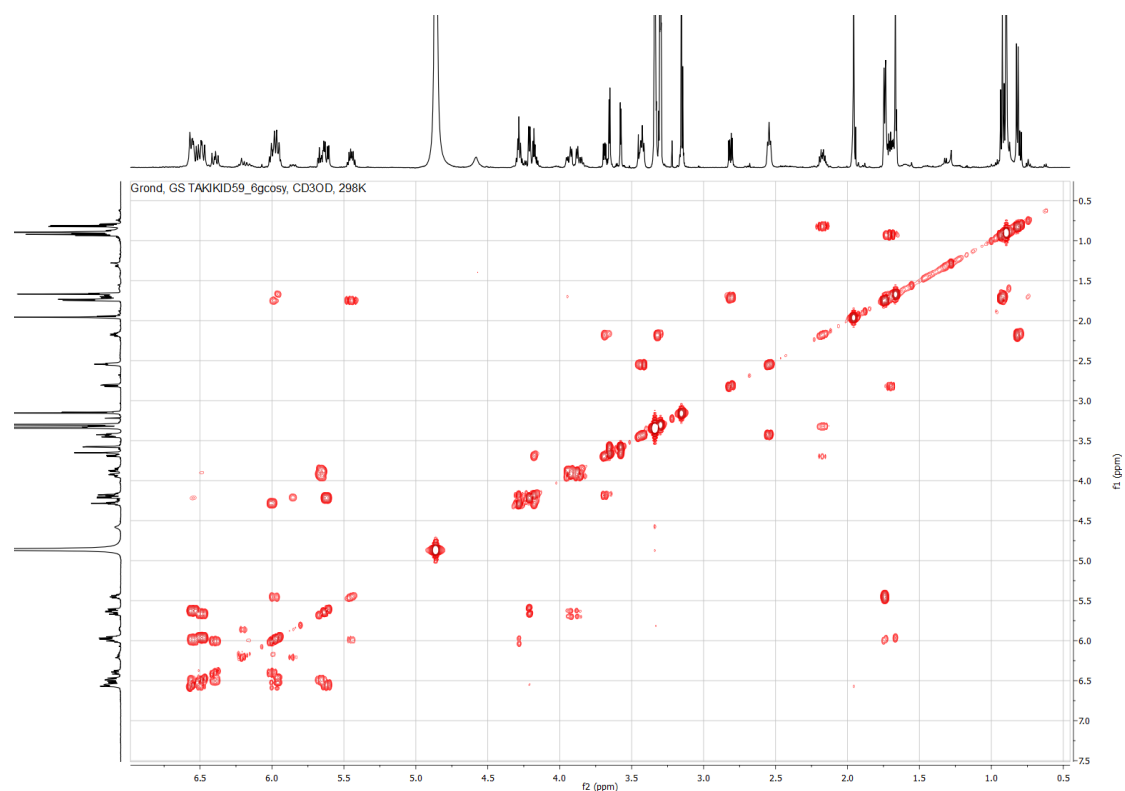

**(IIB) CH-correlation (HSQC) spectrum of 5,6-dihydro-kirromycin (4)**

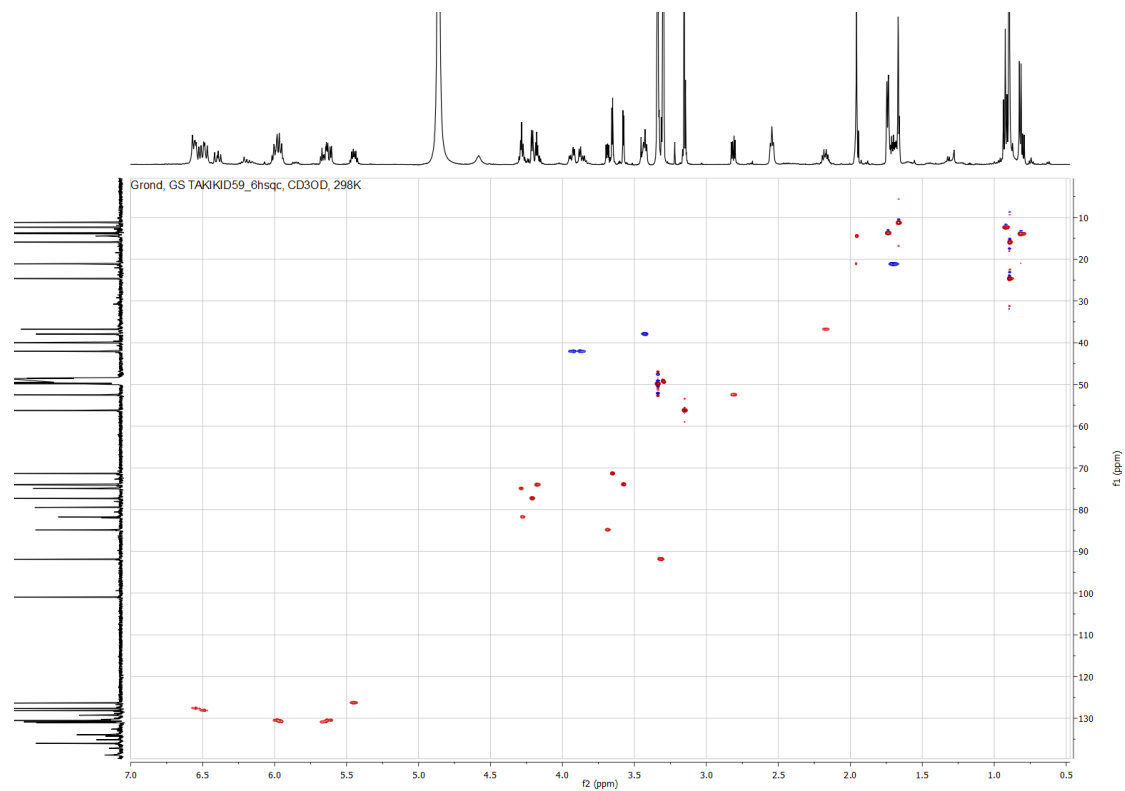

**(IIC) Multiple bond CH-correlation (HMBC) spec. of 5,6-dihydro-kirromycin (4)**

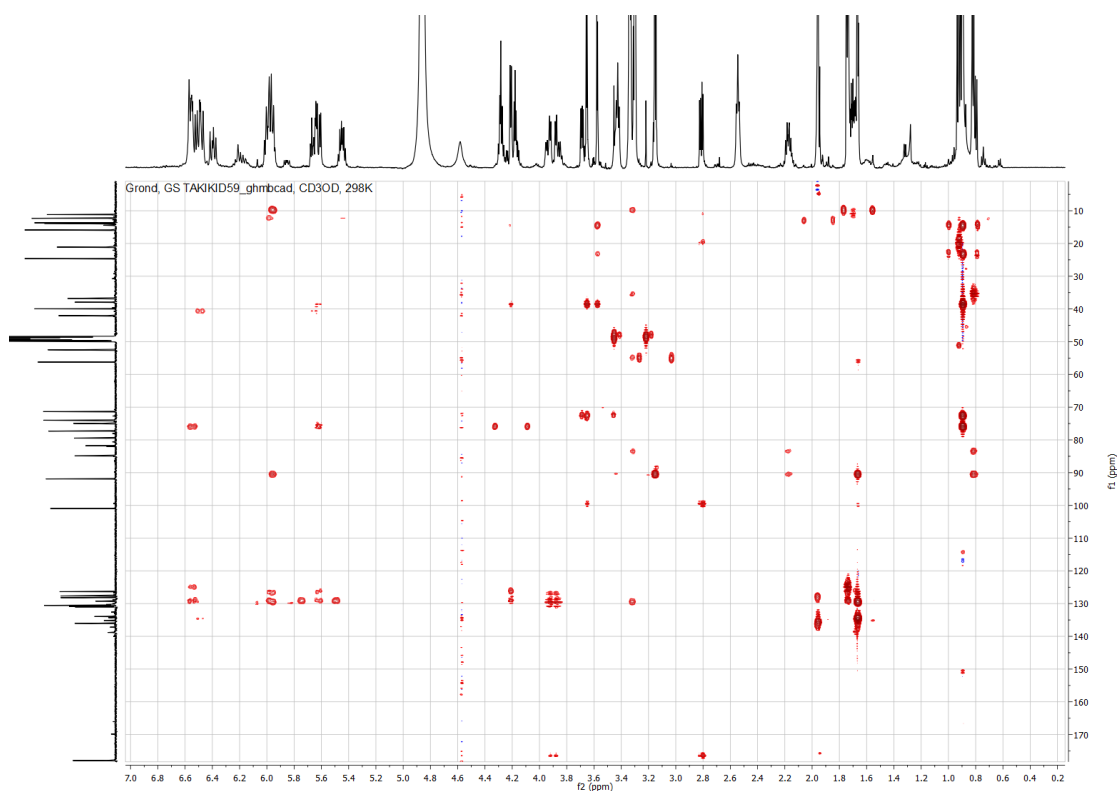

**(IID) Key correlations highlighted for 5,6-dihydro-kirromycin (4)**

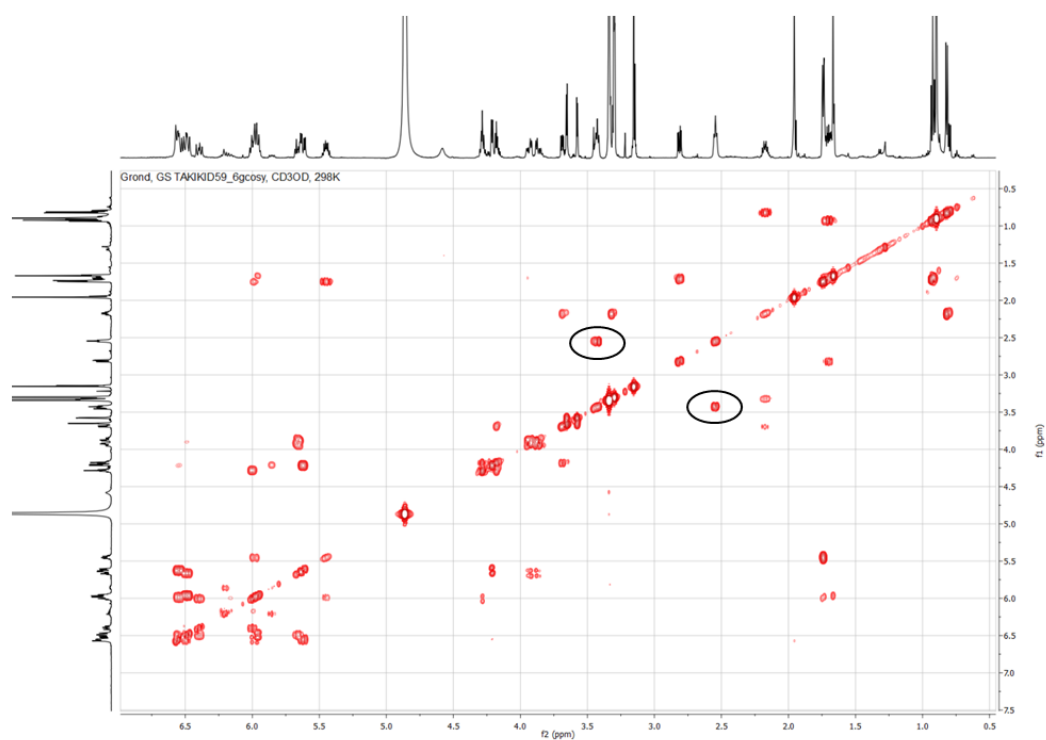

### (III) 30-hydroxy-5,6-dehydro-1-*N*-demethyl-16-deoxy-kirrothricin (5)

COSY and Total Correlated Spectroscopy (TOCSY) spectra established the partial structure for the disrupted furan part (III A) in the 30-hydroxy-5,6-dehydro-1-*N*-demethyl-16-deoxy-kirrothricin (5) derivative isolated from the  $\Delta kirOII$  mutant. H-17 ( $\delta$  4.06) exhibited correlations with both H-19 ( $\delta$  1.69) and H-16 ( $\delta$  2.40, 2.43,  $\delta$  2.25). H-16 exhibited further correlations to an olefinic proton H-15 ( $\delta$  5.90, 6.26), which confirmed the location of the extra double bond. (II) The HSQC gave evidence to the C-H connectivity. (III) The HMBC spectrum showed correlations between H-17 ( $\delta$  4.06), CH<sub>3</sub>-41, C-16 ( $\delta$  40.0) and C-20 ( $\delta$  90.0), and corroborated the final structure of 5. The new kirrothricin-like tetraene fragment was readily assigned from the HMBC-correlations of the CH-groups of C-9 to C-15 (see Formula S5-III). The red shifted UV-Vis spectrum for 5 could be explained by the elongation of the double bond chain.

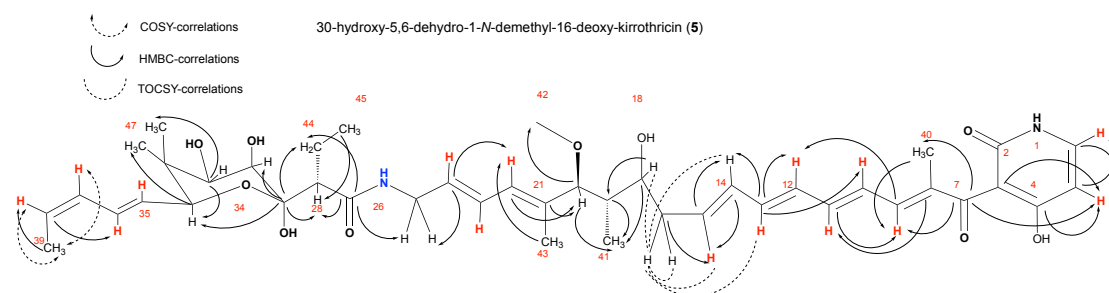

**Formula S5-III** Selected COSY (double dashed arrowed), TOCSY (dashed line), and HMBC (single arrowed) correlations for 30-hydroxy-5,6-dehydro-1-*N*-demethyl-16-deoxy-kirrothricin (5).

**(IIIA) H-H-correlation (COSY) spectrum of 30-hydroxy-5,6-dehydro-1-N-demethyl-16-deoxy-kirrothricin (5)**

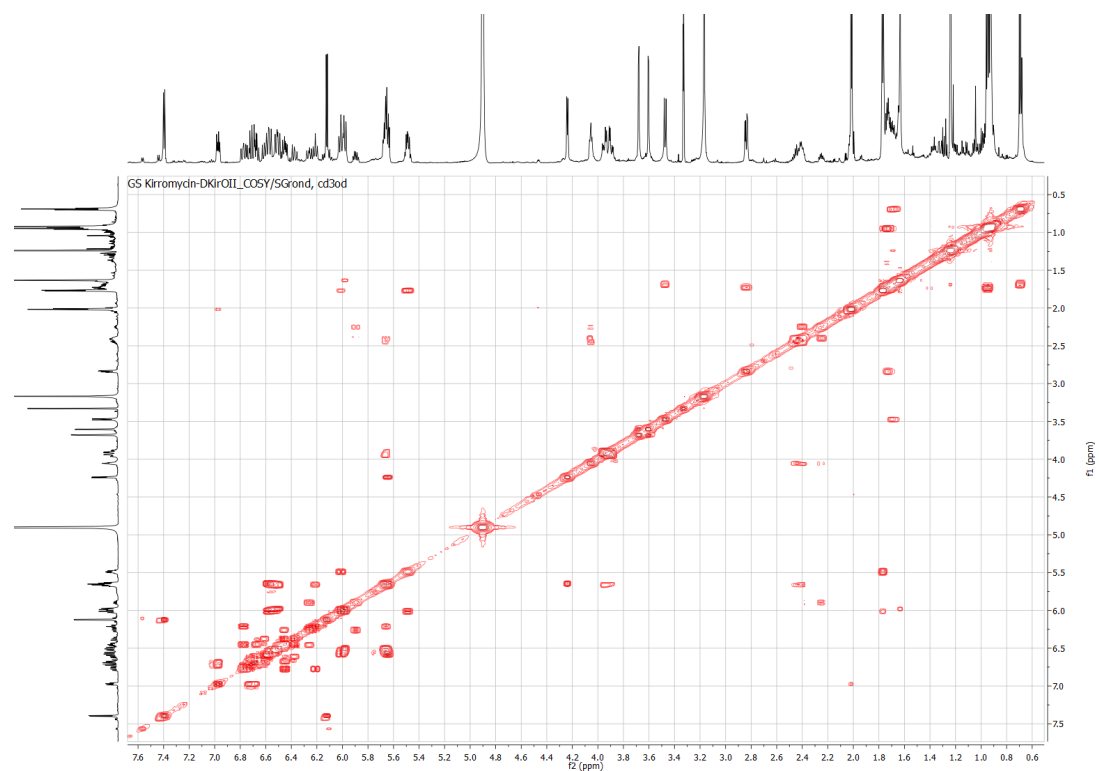

**(IIIB) CH-correlation (HSQC) spectrum of 30-hydroxy-5,6-dehydro-1-N-demethyl-16-deoxy-kirrothricin (5)**

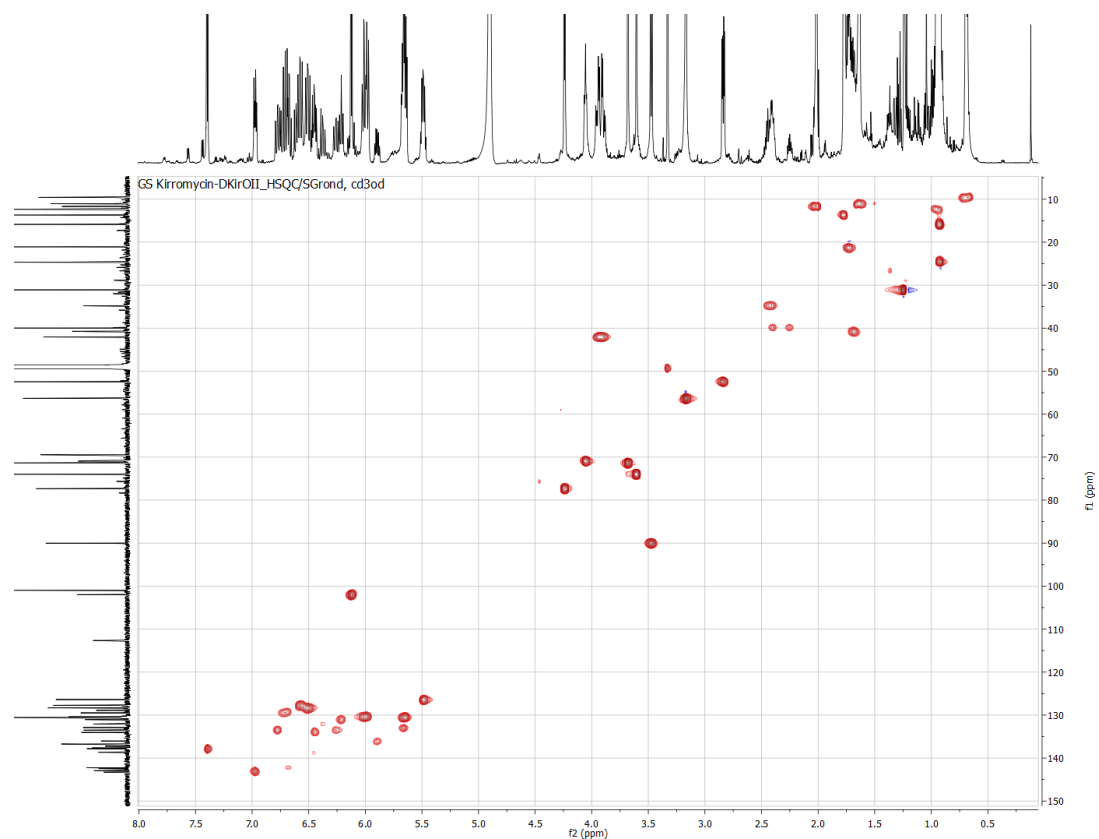



**(IIC) Multiple bond CH-correlation (HMBC) spec. of kirromycin 30-hydroxy-5,6-dehydro-1-N-demethyl-16-deoxy-kirrothricin (5)**

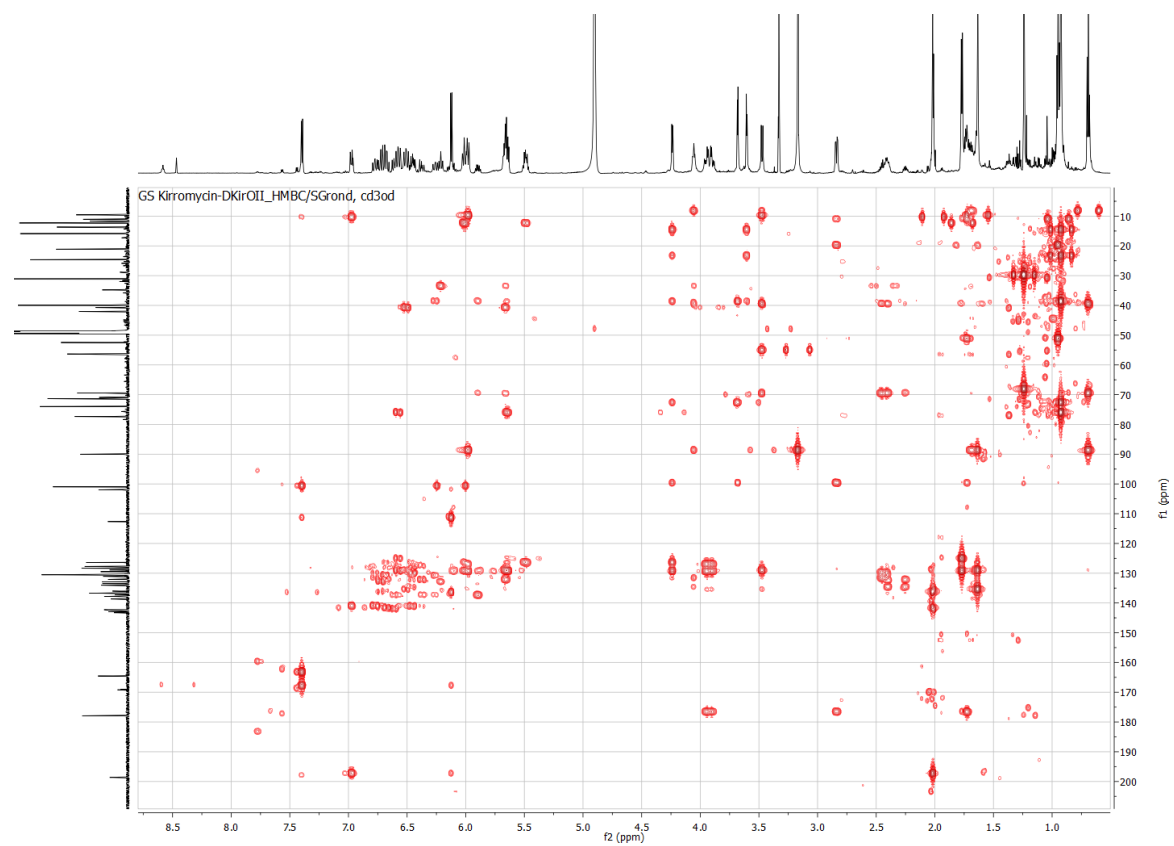

**(IID) Key correlations highlighted for 30-hydroxy-5,6-dehydro-1-*N*-demethyl-16-deoxy-kirrothricin (5)**

HMBC-NMR experiment (CD<sub>3</sub>OD, 700 MHz) showing key correlation of the new 16-CH<sub>2</sub>-group ( $\delta_{\text{H}} = 2.40, 2.43$  ppm) with C-13, C-16, C-17 within the kirrothricin-type carbon chain of 30-hydroxy-5,6-dehydro-1-*N*-demethyl-16-deoxy-kirrothricin (5).

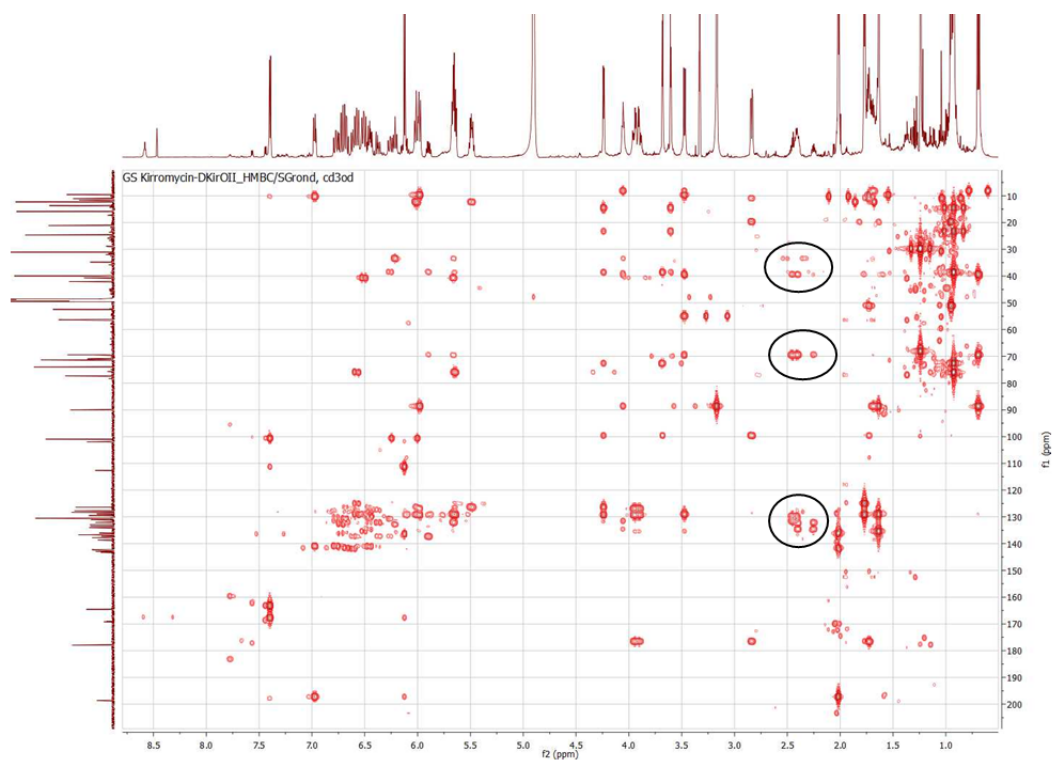

## Figure S6-I – S6-II: Verification of $\Delta kir$ mutants by control PCRs

Control PCRs on genomic DNA (gDNA) of  $\Delta kirM$ ,  $\Delta kirHVI$ ,  $\Delta kirOI$ ,  $\Delta kirOII$ ,  $\Delta kirHIV$ ,  $\Delta kirHV$ , and  $\Delta kirN$  were carried out to confirm successful double crossover (II). The use of primers (KP43 – KP56) targeting an internal 500 bp region of each gene in question (I) allowed for verification of correct mutants by the absence of bands (gene replaced by *ermE*\* promoter or thiostrepton resistance cassette). *Streptomyces collinus* Tü 365 (positive) (1) and water (negative) (2) controls were included for each primer pair. GeneRuler™ 1 kb DNA ladder (Fisher Scientific) (L) was used as marker.

(I)

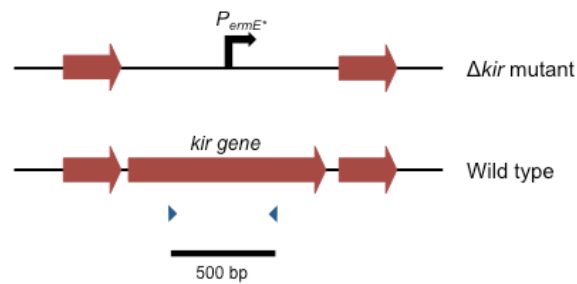

(II)

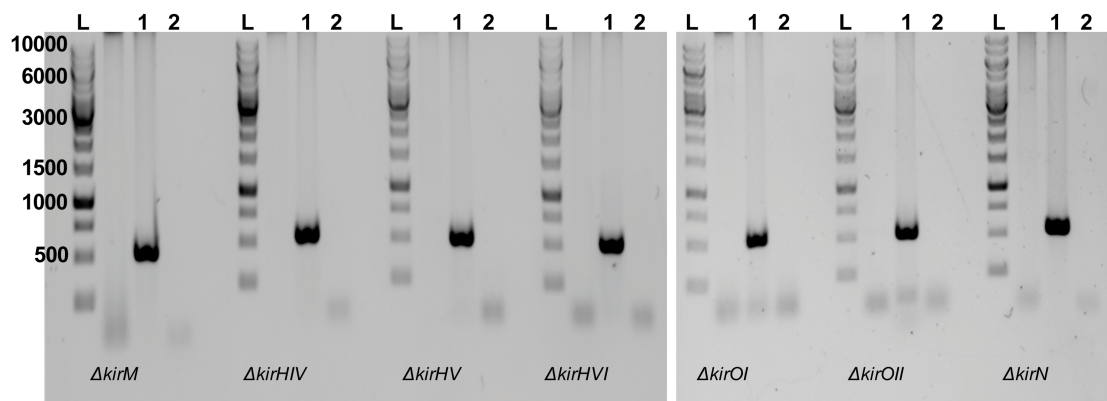

**Figure S7-I – S7-III: Putative enzymatic reactions catalysed by tailoring enzymes KirHVI, KirOI, and KirOII**

Genetic inactivation studies and NMR analysis enabled the prediction of the putative enzymatic reactions catalysed by the phytanoyl-CoA dioxygenase KirHVI (encoded by *kirHVI*) (**I**) and the two P450-dependent hydroxylases KirOI and KirOII (encoded by *kirOI* (**II**) and *kirOII* (**III**)).

**(I)**

Based on its similarity to the hydroxylase Fum3p involved in fumonisin B biosynthesis<sup>10</sup>, KirHVI is postulated to induce  $\alpha$ -ketoglutarate ( $\alpha$ -KG)/Fe(II)-dependent hydroxylation at the C-30 position in the sugar-like moiety in kirromycin.

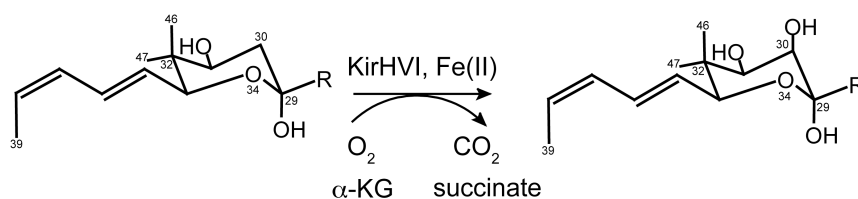

**(II)**

The cytochrome P450-dependent hydroxylase KirOI catalyses hydroxylation of either C-5 or C-6 in the  $\delta$ -lactam ring of the kirromycin biosynthetic intermediate (**i**). The hydroxylated product from the  $\Delta$ *kirOI* mutant was not detected in either the culture broth or the solvent extract. The intermediate can then undergo dehydration, which might be facilitated by a yet uncharacterised enzyme or an *trans*-acting dehydrogenase (DH), to form the double bond between C-5 and C-6 (**ii**). The product **ii** bears the stable pyridone ring with tautomeric equilibrium and aromatic character, presumably responsible for the stability of this dehydrated product.

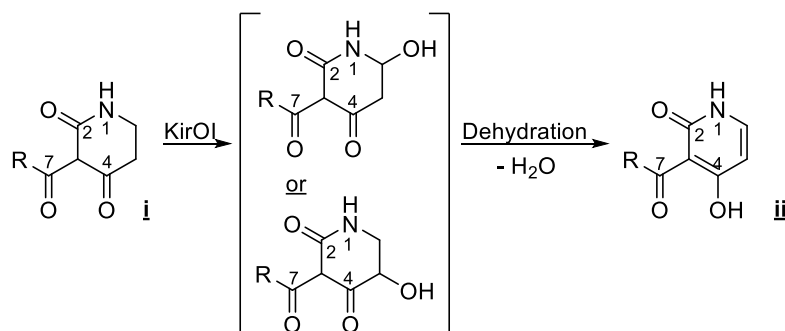

### (III)

Our data suggests KirOII to be involved in formation of the tetrahydrofuran (THF) ring in the centre of the kirromycin molecule.

In case of kirromycin biosynthesis, the PKS-derived precursor molecule of kirromycin could undergo dual CH<sub>2</sub>-hydroxylation at C-14 and C-16, possibly catalysed by the cytochrome P450 monooxygenase KirOII. The hypothesis is strengthened from the sequence comparison of KirOII to AurH (31 % identity and 49 % similarity). The cytochrome P450 monooxygenase AurH has been found to be involved in formation of the THF ring in the antifungal compound aureothin produced by *Streptomyces thioluteus*<sup>11,12</sup> through the introduction of two C-O bonds. In a similar fashion, KirOII might catalyse the following step, including a classical ring-closing dehydration reaction under formation of the THF ring moiety in kirromycin. This conversion is favoured in kirromycin because of increased nucleophilicity of the C-17-hydroxyl group as a result of the hydrogen bonding in a cyclic 6-membered ring including the C-20 carbonyl group. From the  $\Delta$ *kirOII* mutant, the tetraene product, named 30-hydroxy-5,6-dehydro-1-*N*-demethyl-16-deoxy-kirrothricin (**5**), is isolated from the culture broth due to chemically favoured dehydration to the stable extended conjugated double bond system between C-6 and C-15.

While this is a plausible enzymatic reaction, the scheme currently lacks an additional enzyme responsible for catalysing the reduction of C=O to C-OH at the C-20 position in kirromycin. Such an enzyme remains to be identified and characterized.

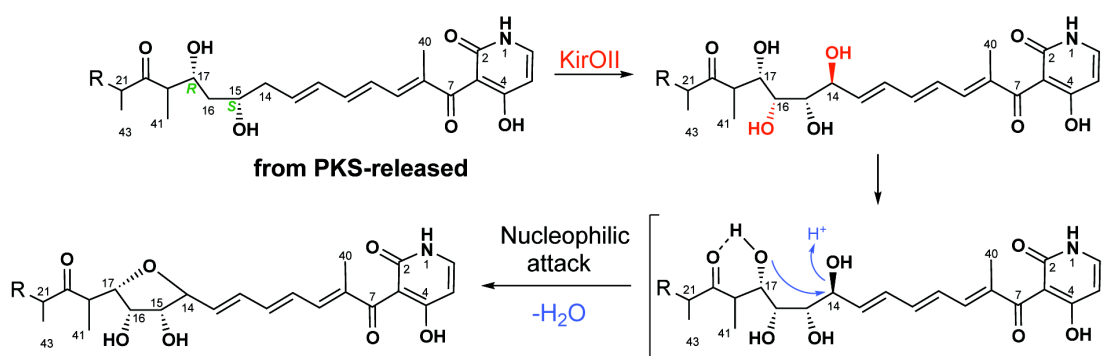

## Supplementary references

1. MacNeil, D. J. *et al.* Analysis of *Streptomyces avermitilis* genes required for avermectin biosynthesis utilizing a novel integration vector. *Gene* **111**, 61–68 (1992).
2. Wolf, H. & Zähner, H. Stoffwechselprodukte von Mikroorganismen. *Arch. Mikrobiol.* **83**, 147–154 (1972).
3. Weber, T. *et al.* Molecular Analysis of the Kirromycin Biosynthetic Gene Cluster Revealed  $\beta$ -Alanine as Precursor of the Pyridone Moiety. *Chem. Biol.* **15**, 175–188 (2008).
4. Myronovskyi, M., Welle, E., Fedorenko, V. & Luzhetskyy, A. Beta-glucuronidase as a sensitive and versatile reporter in actinomycetes. *Appl. Environ. Microbiol.* **77**, 5370–5383 (2011).
5. Menges, R., Muth, G., Wohlleben, W. & Stegmann, E. The ABC transporter Tba of *Amycolatopsis balhimycina* is required for efficient export of the glycopeptide antibiotic balhimycin. *Appl. Microbiol. Biotechnol.* **77**, 125–134 (2007).
6. Muth, G., Wohlleben, W. & Puhler, A. The minimal replicon of the *Streptomyces ghanaensis* plasmid pSG5 identified by subcloning and Tn5 mutagenesis. *Mol. Gen. Genet.* **211**, 424–429 (1988).
7. Tong, Y., Charusanti, P., Zhang, L., Weber, T. & Lee, S. Y. CRISPR-Cas9 Based Engineering of Actinomycetal Genomes. *ACS Synth. Biol.* **4**, 1020–1029 (2015).
8. Tong, Y., Robertsen, H. L., Blin, K., Weber, T. & Lee, S. Y. in *Methods in Molecular Biology* **1671**, 163–184 (2018).
9. Frost, B. M., Valiant, M. E. & Dulaney, E. L. Antibacterial Activity of Heneicomycin. *J. Antibiot.* **32**, 626–629 (1979).
10. Ding, Y., Bojja, R. S. & Du, L. Fum3p, a 2-Ketoglutarate-Dependent Dioxygenase Required for C-5 Hydroxylation of Fumonisin in *Fusarium verticillioides*. *Appl. Environ. Microbiol.* **70**, 1931–1934 (2004).
11. He, J. & Hertweck, C. Iteration as Programmed Event during Polyketide Assembly; Molecular Analysis of the Aureothin Biosynthesis Gene Cluster. *Chem. Biol.* **10**, 1225–1232 (2003).
12. Richter, M. E. A., Traitcheva, N., Knüpfer, U. & Hertweck, C. Sequential Asymmetric Polyketide Heterocyclization Catalyzed by a Single Cytochrome P450 Monooxygenase (AurH). *Angew. Chemie* **120**, 9004–9007 (2008).
